# Supplementary material
Source: publisher figshare collection journal article supplement (https://gsapubs.figshare.com/articles/dataset/_/22220782)
Supplement: Supplementary file 1 [file 39495232]

Zhang, Y.P., Zhang, P.Z., Lease, R.O., Zhou, R., Wang, Y.J., Yan, Y.G., Wang, Y., Zheng, W.J., Liu, B.X., Li, Z.G., Liang, H., Hui, G.G., Sun, C., Tian, Q.Y., Xu, B.B., and Wang, W.T., 2023, Oligocene-Miocene Northward Growth of the Tibetan Plateau: Insights from Intermontane Basins in the West Qinling Belt, NW China: GSA Bulletin, <https://doi.org/10.1130/B36722.1>.

## Supplemental Material

**Text S1.** Demagnetization and tests.

**Text S2.** Anisotropy of magnetic susceptibility (AMS) analyses.

**Text S3.** Detrital Zircons U-Pb Ages test.

**Figure S1.** Anhua sampling section.

**Figure S2.** Photographs of the sampled Anhua-Huicheng basin section.

**Figure S3.** Orthogonal (Zijderveld) vector plots of the representative thermal demagnetization behaviors of specimens from the Anhua section.

**Figure S4.** Equal-area plots of accepted ChRMs (185 sites) from the Anhua section in (a) geographic and (b) tilt-corrected coordinates.

**Figure S5.** AMS data. (a) Equal-area, lower-hemisphere projection of anisotropy of the maximum (blue squares), medium (green triangles) and minimum (pink circles) susceptibility axes in stratigraphic coordinates. (b)  $P_j-T$  (corrected degrees of anisotropy vs. shape parameter). (c) Flinn diagram.

**Table S1.** Main characteristics and interpretations of major sedimentary facies in this study.

**Table S2.** Fossils were discovered along the West Qinling Belt.

**Table S3.** Zircon U-Pb geochronological analyses.

**Table S4.** Quantitative comparison of age distributions for the Anhua basin (Z1&Z2; Z3&Z4).

# Supplemental Material

1

2 **Text S1.** Demagnetization and tests.

3 **Text S2.** Anisotropy of magnetic susceptibility (AMS) analyses.

4 **Text S3.** Detrital Zircons U-Pb Ages test.

5 **Figure S1.** Anhua sampling section.

6 **Figure S2.** Photographs of the sampled Anhua-Huicheng basin section.

7 **Figure S3.** Orthogonal (Zijderveld) vector plots of the representative thermal demagnetization  
8 behaviors of specimens from the Anhua section.

9 **Figure S4.** Equal-area plots of accepted ChRMs (185 sites) from the Anhua section in (a)  
10 geographic and (b) tilt-corrected coordinates.

11 **Figure S5.** AMS data. (a) Equal-area, lower-hemisphere projection of anisotropy of the  
12 maximum (blue squares), medium (green triangles) and minimum (pink circles) susceptibility  
13 axes in stratigraphic coordinates. (b)  $P_J$ -T (corrected degrees of anisotropy vs. shape parameter).  
14 (c) Flinn diagram.

15 **Table S1.** Main characteristics and interpretations of major sedimentary facies in this study.

16 **Table S2.** Fossils were discovered along the West Qinling Belt.

17 **Table S3.** Zircon U-Pb geochronological analyses.

18 **Table S4.** Quantitative comparison of age distributions for the Anhua basin (Z1&Z2; Z3&Z4).

19

20 **Text S1** Demagnetization and tests

21 The intensity of the natural remanent magnetization (NRM) for these specimens was  $10^{-2}$ - $10^{-4}$  A/m.  
22 Progressive thermal demagnetization successfully resolved multiple components of magnetization.  
23 After the removal of only one or two secondary components of magnetization, the majority of  
24 samples exhibit a linear decay to the origin (Figure S1). The low-temperature component was  
25 typically removed at 200-250°C, but sometimes not until 450°C. We interpreted this low-  
26 temperature component as the removal of secondary remanent magnetization. The high-temperature  
27 component decays toward the origin, typically exhibits stable behavior between 450°C and 670°C,  
28 and is interpreted to reflect the characteristic remanent magnetization (ChRM). Most samples show  
29 an accelerated decay in remanent intensity just below 580°C or 680°C, indicating that magnetite  
30 and hematite are the major magnetic carriers in these redness deposits (Figure 9). For most samples  
31 throughout the stratigraphic section, there is no significant difference in remanence direction, when  
32 it is defined by the 450-580°C or 600-670°C parts of the unblocking temperature spectra. This  
33 suggests that both magnetic carriers recorded the same paleomagnetic field when their remanences  
34 became fixed in the rock.

35 ChRM directions were determined by at least four, typically five to eight points from the stable  
36 hightemperature component (>450°C) in the demagnetization trajectory as implemented in Pmag  
37 3.1 b2 (Jones, 2002). By principal component analysis, ChRM directions with maximum angular  
38 deviation (MAD) above 15° were rejected from further analyses, thus discarding 17 (5%) of the  
39 measured specimens. Virtual geomagnetic poles (VGPs) were then calculated based on the magnetic  
40 declination and inclination. Samples with VGPs < 10° were not used to define the magnetic polarity  
41 stratigraphy for the Anhua section. This eliminated 81 sampled horizons. Finally, a total of 185

42 (65%) samples were accepted to construct the magnetic polarity sequence of the Anhua section.  
43 Of the 283 samples, 107 are of normal polarity and 75 are of reverse polarity. The mean directions  
44 for normal and reversal polarity poles are  $D_g = 33.8^\circ$ ,  $I_g = 44.0^\circ$  with  $k_g = 7.3$ ,  $\alpha_{95} = 5.9$ , and  $D_g =$   
45  $191.8^\circ$ ,  $I_g = 42.3^\circ$  with  $k_g = 5.9$ ,  $\alpha_{95} = 7.4$  in geographic coordinates and  $D_s = 27.6^\circ$ ,  $I_s = 44.1^\circ$  with  
46  $k_s = 9.0$ ,  $\alpha_{95} = 4.8$ , and  $D_s = 191.3^\circ$ ,  $I_s = 41.2^\circ$  with  $k_s = 5.9$ ,  $\alpha_{95} = 7.4$  in tilt-corrected coordinates,  
47 respectively (Figure S3), where D is declination, I is inclination, k is the precision parameter, and  
48  $\alpha_{95}$  is the radius that the mean direction lies within 95% confidence (Fisher, 1953). The  
49 paleomagnetic reversal test was used to assess whether the average normal pole and reversed pole  
50 are statistically antipodal within a given confidence limit (Mcfadden & McElhinny, 1990).

51

## 52 **Text S2** Anisotropy of magnetic susceptibility (AMS) analyses

53 Combined spatial and geometric configuration of the components in a rock is termed petro-fabric  
54 or rock fabric and can comprise aspects including lineation, foliation, and grain size which provide  
55 important clues for understanding magma flow direction in igneous rocks, paleocurrent flow  
56 direction in sedimentary rocks and tectonic strain imparted to metamorphic or otherwise deformed  
57 rocks (Ellwood, 1978; Fossen, 2010; Kent & Lowrie, 1975). The AMS method can determine the  
58 internal petro-fabric efficiently and relatively rapidly from the preferred orientation of paramagnetic  
59 and ferromagnetic grains. Three types of AMS fabrics are defined: the AMS in multi domain  
60 magnetite grains is dominated by shape anisotropy with the geometric long axis parallel to the easy  
61 axis of magnetization (K1). In rocks dominated by multi domain magnetite, K1 is parallel to the  
62 structural lineation and K3 is perpendicular to the foliation; this is defined as a normal magnetic  
63 fabric.

64 AMS analyses were tested by AGICO Kappabridge (KLY-4S) in the PGL. The AMS is  
65 mathematically described as a second rank tensor and generally visualized by an ellipsoid with three  
66 principal eigenvectors,  $K1 > K2 > K3$ . The maximum principal axis (K1) defines the lineation; the  
67 minimum principal axis (K3) is perpendicular to the foliation defined by the maximum (K1) and  
68 intermediate (K2) principal axes (Cañón-Tapia, 1994).

69

#### 70 **Text S3** Detrital Zircons U-Pb Ages test

71 More than 5 kg of sandstones for each of the four samples were taken from a single outcrop. Zircon  
72 crystals were extracted from sandstone samples following standard water table, magnetic and  
73 density separation procedures. Individual zircon crystals (generally more than 300 grains) were  
74 mounted into epoxy resin randomly to avoid sampling bias, then approximately 105 grains were  
75 randomly dated for each of the samples. Zircon U-Pb dating was carried out at the State Key  
76 Laboratory of Earthquake Dynamics, Institute of Geology, China Earthquake Administration, by an  
77 Agilent 7900 ICP-MS coupled with a 193 nm excimer laser-ablation system of a Resolution M50-  
78 LR. All samples were analyzed using a laser spot size of 40  $\mu\text{m}$ , a frequency of 10 Hz and laser  
79 energy density of 4.0 J/cm<sup>2</sup>. To determine fractionation factors and correct for instruments drift, two  
80 standards (91500 and GJ-1) were analyzed every 10 grains. As for elements concentration analysis,  
81 NIST610 was external standard and <sup>29</sup>Si was the internal standard. ICPMSDataCal software was  
82 used to calculate the isotope ratios and element contents (Liu et al., 2008). The common lead  
83 correction followed the method described by Andersen (2002). Ages younger than ca. 1000 Ma are  
84 based on corrected <sup>206</sup>Pb/<sup>238</sup>U ratio, whereas ages older than ca. 1000 Ma are based on corrected  
85 <sup>207</sup>Pb/<sup>206</sup>Pb ratio (Gehrels et al., 2006). Before plotting, we used a moderate discordance filter (10%)

86 to remove highly discordant grains. All reported errors in this study are  $1\sigma$ . All of the 457 results

87 that yield isotopic data with acceptable discordance and uncertainty are in listed in supporting

88 information Table A3.

89

90 **Figure S1.** Anhua sampling section(33°28.32'N 105°01.38'E).

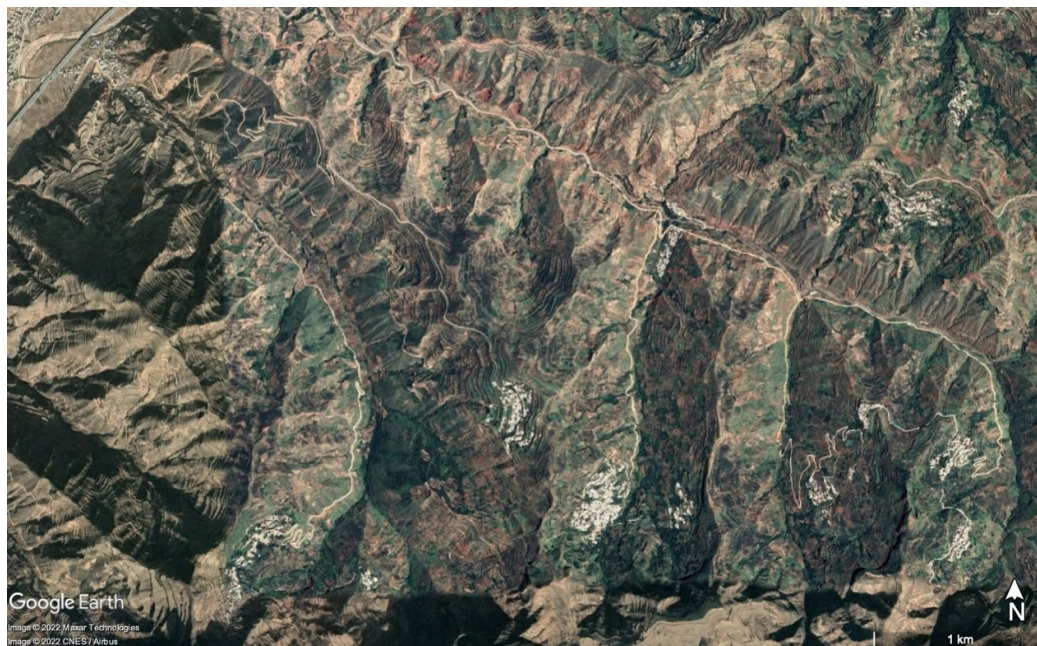

91

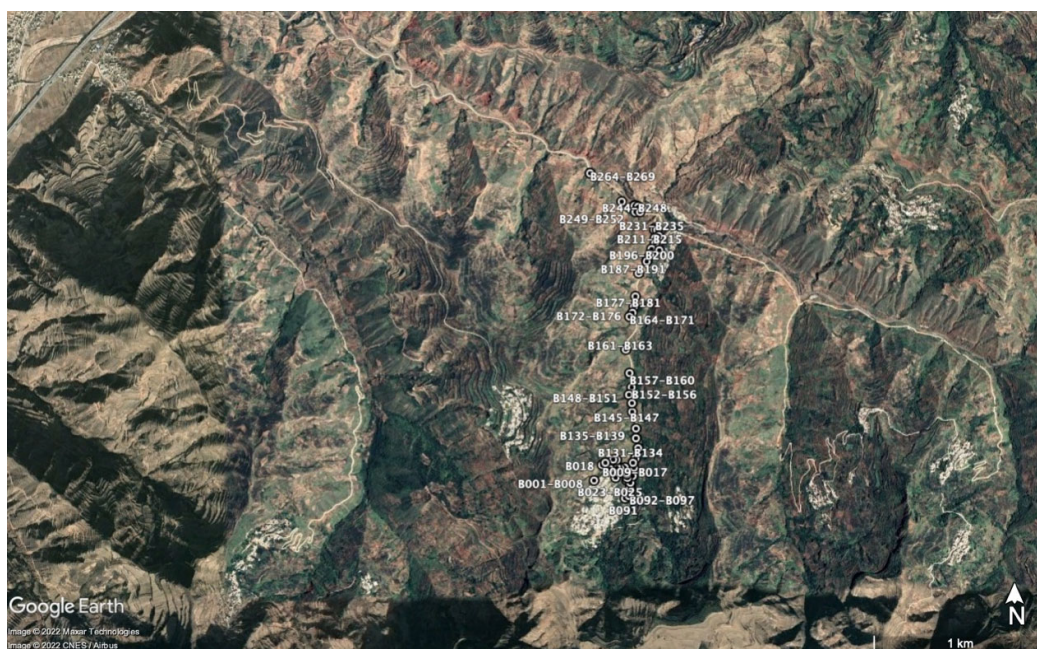

92

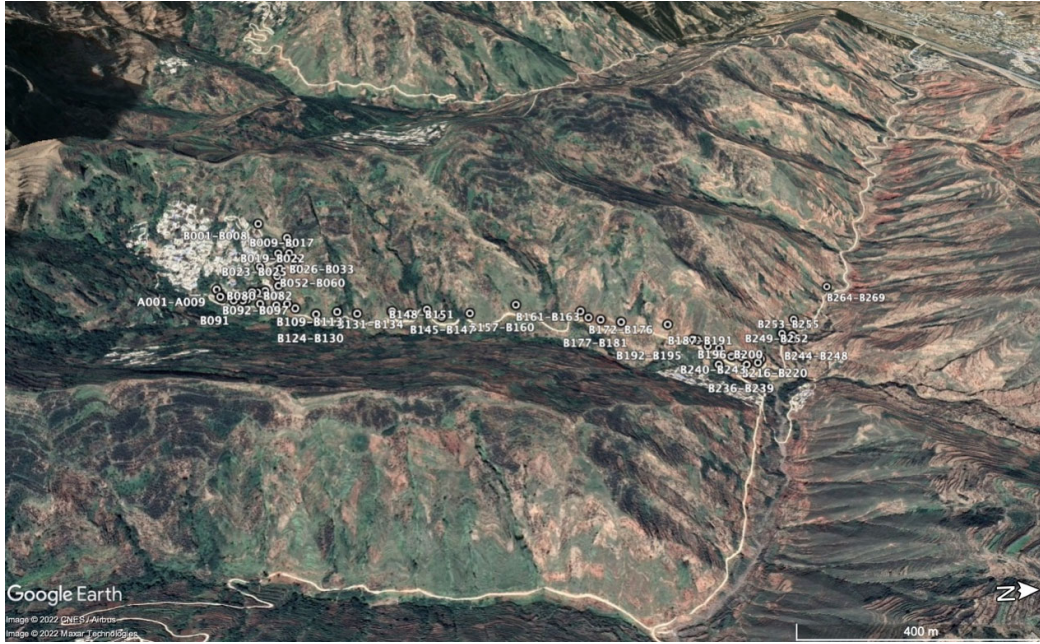

93

94

95

**Figure S2.** Photographs of the sampled Anhua-Huicheng basin section.

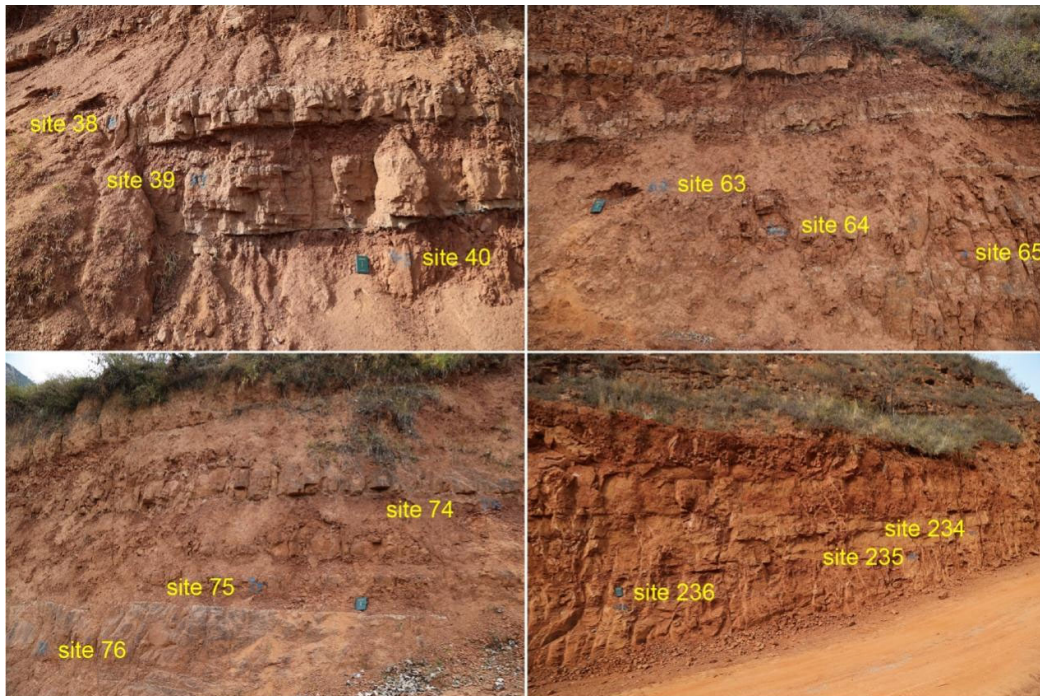

96

97



98 **Figure S3.** Orthogonal (Zijderveld) vector plots of the representative thermal demagnetization  
 99 behaviors of specimens from the Anhua section. The hollow (solid) circles show the declination  
 100 (inclination) within the orthogonal demagnetization diagrams. NRM is the natural remanent  
 101 magnetization before demagnetization, and the numbers mark the temperature steps of  
 102 demagnetization.

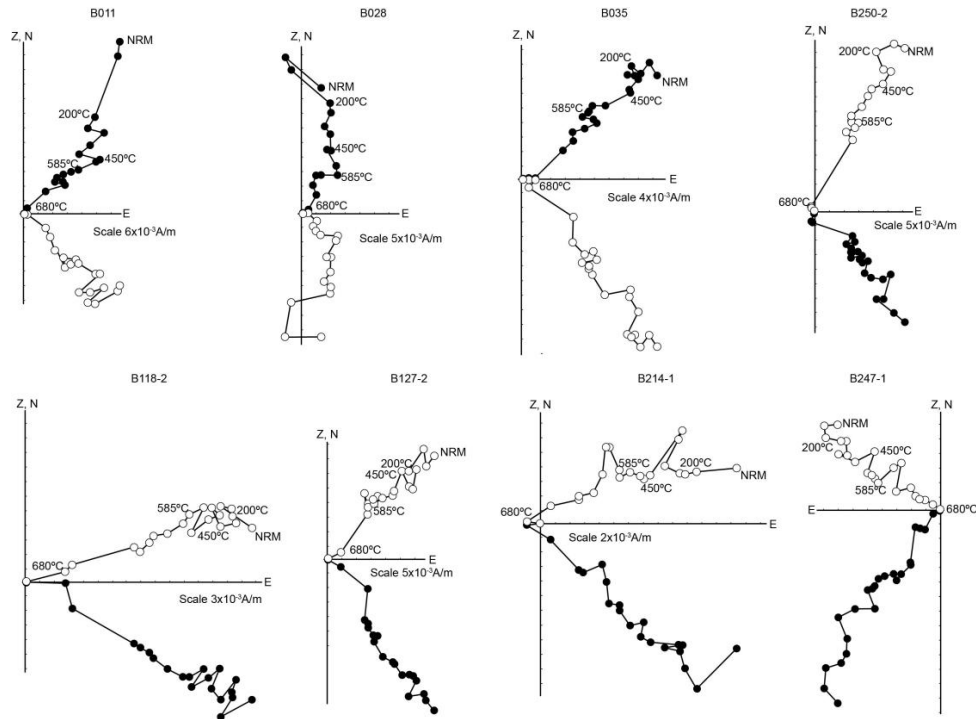

103  
 104  
 105 **Figure S4.** Equal-area plots of accepted ChRMs (185 sites) from the Anhua section in (a) geographic  
 106 and (b) tilt-corrected coordinates. In the Figures 10(a) and 10(b), hollow (solid) circles plot in the  
 107 lower (upper) hemisphere. The ovals indicate the  $\alpha_{95}$  error around the Fisher's mean with the mean  
 108 data.

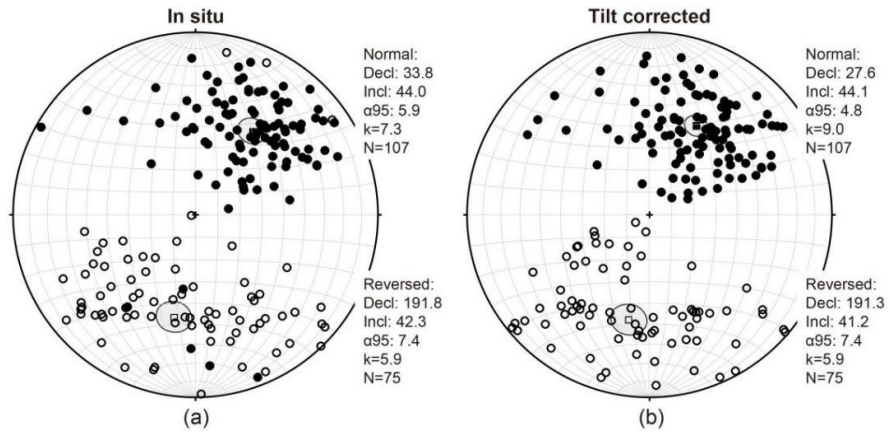

109

110 **Figure S5.** AMS data. (a) Equal-area, lower-hemisphere projection of anisotropy of the maximum  
111 (blue squares), medium (green triangles) and minimum (pink circles) susceptibility axes in  
112 stratigraphic coordinates. (b)  $P_T$ - $T$  (corrected degrees of anisotropy vs. shape parameter). (c) Flinn  
113 diagram.

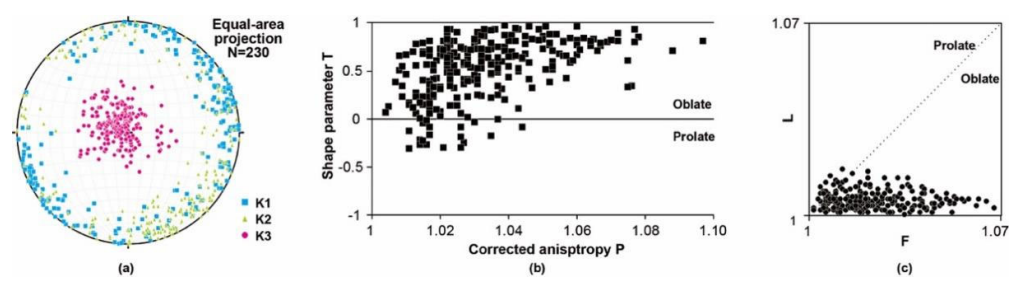

114  
115

**Table S1.** Lithofacies and interpretations used in this study.

| <b>Lithofacies<br/>code</b> | <b>Description</b>                                                                                       | <b>Interpretation</b>                                                       |
|-----------------------------|----------------------------------------------------------------------------------------------------------|-----------------------------------------------------------------------------|
| Gms                         | Structureless, massive, matrix supported gravel                                                          | Debris flow deposits                                                        |
| Gma                         | Poorly sorted, pebble to cobbles conglomerates; matrix -support; fining-up pattern sequence              | Gravity flow or braided river lag deposits                                  |
| Gmb                         | Poorly sorted, pebble to cobbles conglomerates; matrix support; coarsening-up pattern sequence           | Gravity flow deposits                                                       |
| Gcm                         | Poorly sorted massive pebble conglomerates interbedded with fine sandstone                               | Debris flow deposits                                                        |
| Gh                          | Structureless, poorly sorted, pebble-cobbles conglomerates                                               | Sheet flood deposits                                                        |
| Gt                          | Poorly sorted layered conglomerate with trough and cross-stratification                                  | Braided channel deposits                                                    |
| Gb                          | Poorly sorted, clast-supported pebble to boulder conglomerates with cross-stratification                 | Longitudinal bars                                                           |
| Gp                          | Stratified gravel interbedded with sandstone with planar cross-stratification; matrix- and clast support | Longitudinal bars or deltaic growths from older bar remnants                |
| Gs                          | Poorly sorted massive sandstone to conglomerate                                                          | Debris flow or longitudinal bars or lag deposits                            |
| Sm                          | Structureless, fine to coarse sandstone, may be pebbly                                                   | Upper flow regime                                                           |
| Sh                          | Fine to coarse sandstone, may be pebbly, with horizontal lamination, parting or streaming lineation      | Planar bed flow (lower and upper flow regime)                               |
| St                          | Medium to very coarse sandstone, may be pebbly, with cross-stratification                                | Dunes (lower flow regime)                                                   |
| Sl                          | Fine sandstone, may be with sandy conglomerate lens pebbly, with low angle cross-stratification          | Alluvial fan braided channel/ fan delta/<br>underwater distributary channel |
| Sr                          | Very fine to coarse sandstone with ripple                                                                | Lower flow regime                                                           |
| Sc                          | Fine sandstone with cross-stratification                                                                 | Lower flow regime                                                           |

|    |                                                                    |                                                                                         |
|----|--------------------------------------------------------------------|-----------------------------------------------------------------------------------------|
| Se | Erosional scours with intra-clasts with crude cross-stratification | Scour fills                                                                             |
| Fl | Laminated, sand, silt, mud with small ripples                      | Overbank or waning flood deposits                                                       |
| Fm | Massive mud and silt                                               | Braided river (middle reaches) or<br>overbank or drape deposits/ lacustrine<br>deposits |
| Ml | Laminated mud                                                      | lacustrine deposits                                                                     |
| Mm | Massive mud                                                        | overbank or lacustrine deposits                                                         |
| E  | Layered gypsum beds                                                | Chemical precipitation in an evaporative<br>lake                                        |

---

Note: Modified after Miall (1978) and DeCelles et al. (1991).

---

**Table S2.** Fossils were discovered along the West Qinling Belt.

| Location             | Fossils                                                                                                                                                                                                                                                                                                                                                                                                                                                                                                                                                                                                                                                                                                                                                                                                                                                                                  | Age                |
|----------------------|------------------------------------------------------------------------------------------------------------------------------------------------------------------------------------------------------------------------------------------------------------------------------------------------------------------------------------------------------------------------------------------------------------------------------------------------------------------------------------------------------------------------------------------------------------------------------------------------------------------------------------------------------------------------------------------------------------------------------------------------------------------------------------------------------------------------------------------------------------------------------------------|--------------------|
| Anhua-Huicheng Basin | <i>Hipparion platyodus</i> , <i>Gazella gaudryi</i> , <i>Acerorhinus</i> , <i>Testudo</i> sp., <i>Dryopithecus wuduensis</i> ,<br><i>Eomellivora</i> sp., <i>Plihyaena</i> sp., <i>Machairodus fossili</i> , <i>Paramachairodus</i> sp., <i>Chalicotherium wuduensis</i> ,<br><i>Acerorhinus</i> sp., <i>Chleuastochoerus stehlini</i> , <i>Honanotherium schlosseri</i> , <i>Samotherium</i> sp., <i>Eostyloceras</i><br><i>blaincillei</i> , <i>Cervavitus demissus</i> , <i>Metacervulus bidens</i> .                                                                                                                                                                                                                                                                                                                                                                                 | Miocene            |
| Lintan Basin         | <i>Eucypris</i> sp., <i>Darwinula</i> sp., <i>Cypris</i> sp., <i>Planorbarius</i> sp., <i>Hippeudis</i> sp.                                                                                                                                                                                                                                                                                                                                                                                                                                                                                                                                                                                                                                                                                                                                                                              | Miocene            |
| Zeku Basin           | <i>Notonectidae</i> sp., <i>Corixidae</i> sp., <i>Cercis</i> sp., <i>Acer subginnala</i> ,<br><i>Typha latissima</i> , <i>Phragmites oeningensis</i> ,<br><i>Phragmites oeningensis yperacites</i> sp.                                                                                                                                                                                                                                                                                                                                                                                                                                                                                                                                                                                                                                                                                   | Oligocene-Miocene  |
| Wushan Basin         | <i>Gomphotherium wimani</i> .                                                                                                                                                                                                                                                                                                                                                                                                                                                                                                                                                                                                                                                                                                                                                                                                                                                            | Miocene            |
| Linxia Basin         | Hewangjia formation (3.4-5.2 Ma):<br><i>Hipparion</i> sp.<br>Dongxiang formation (5.2-9 Ma):<br>Giraffidae gen. et sp. indet.; Longguan fauna: <i>Machairodus</i> ( <i>Epimachairodus</i> ?) cf. <i>ultimus</i> , <i>Indarctos</i><br>sp., <i>Ictitherium gaudryi</i> , <i>Adcrocuta</i> cf. <i>eximia variabilis</i> , <i>Hipparion</i> ( <i>Hipparion</i> ) <i>platyodus</i> , <i>H.</i> ( <i>H.</i> )<br><i>fossatum</i> , <i>Hipparion</i> ( <i>Cremohipparion</i> ) cf. <i>licenti</i> , <i>Acerorhinus linxiaensis</i> sp. nov., <i>A. palaeosinensis</i> ,<br><i>Chilotherium</i> ( <i>Chilotherium</i> ) <i>anderssoni</i> , <i>C. gracile</i> , <i>Gazella gaudryi</i> , <i>Antilope</i> sp., <i>Cervavitus</i><br><i>novorossiae</i> , <i>Propotamochoerus</i> sp.<br>Tala formation (29Ma):<br><i>Dzungariotherium orgosense</i> , <i>Paraentelodon macrognathus</i> sp. nov. | Pliocene-Oligocene |

Data are derived from the following: Anhua-Huicheng Basin: Zhang and Xue (1994); Lintan Basin: GBGMR (1971); Zeku Basin: QBGMR (1971); Wushan Basin: S. Q. Wang et al. (2013); Z. Wang et al. (2012); Linxia Basin: Fang et al. (2003); Li et al. (1980); Qiu et al. (1990).

**Table S3.** Zircon U-Pb geochronological analyses.

| <b>Z1</b>     |      |                                  |           |                                  |           |                                   |           |                                   |           |                                  |           |                                  |           |
|---------------|------|----------------------------------|-----------|----------------------------------|-----------|-----------------------------------|-----------|-----------------------------------|-----------|----------------------------------|-----------|----------------------------------|-----------|
| Analysis spot | Th/U | $^{207}\text{Pb}/^{235}\text{U}$ | $1\sigma$ | $^{206}\text{Pb}/^{238}\text{U}$ | $1\sigma$ | $^{208}\text{Pb}/^{232}\text{Th}$ | $1\sigma$ | $^{207}\text{Pb}/^{206}\text{Pb}$ | $1\sigma$ | $^{207}\text{Pb}/^{235}\text{U}$ | $1\sigma$ | $^{206}\text{Pb}/^{238}\text{U}$ | $1\sigma$ |
| 1             | 0.53 | 0.5523                           | 0.0141    | 0.0685                           | 0.0015    | 0.0216                            | 0.0004    | 561                               | 48        | 447                              | 9         | 427                              | 9         |
| 2             | 0.51 | 0.2551                           | 0.0061    | 0.0359                           | 0.0008    | 0.0113                            | 0.0002    | 289                               | 50        | 231                              | 5         | 228                              | 5         |
| 3             | 1.09 | 1.3034                           | 0.0401    | 0.1386                           | 0.0030    | 0.0412                            | 0.0008    | 830                               | 48        | 847                              | 18        | 837                              | 17        |
| 4             | 0.76 | 5.1649                           | 0.1350    | 0.3403                           | 0.0072    | 0.0946                            | 0.0018    | 1793                              | 37        | 1847                             | 22        | 1888                             | 35        |
| 5             | 1.49 | 1.2548                           | 0.0594    | 0.1371                           | 0.0031    | 0.0435                            | 0.0009    | 960                               | 62        | 826                              | 27        | 828                              | 17        |
| 6             | 0.93 | 1.2682                           | 0.0391    | 0.1468                           | 0.0031    | 0.0452                            | 0.0009    | 736                               | 49        | 832                              | 18        | 883                              | 18        |
| 7             | 0.69 | 5.3397                           | 0.1236    | 0.3446                           | 0.0073    | 0.0614                            | 0.0011    | 1844                              | 36        | 1875                             | 20        | 1909                             | 35        |
| 8             | 0.47 | 0.9791                           | 0.0284    | 0.1149                           | 0.0025    | 0.0340                            | 0.0007    | 647                               | 49        | 693                              | 15        | 701                              | 14        |
| 9             | 0.44 | 0.2407                           | 0.0062    | 0.0358                           | 0.0008    | 0.0112                            | 0.0002    | 250                               | 54        | 219                              | 5         | 227                              | 5         |
| 10            | 0.72 | 1.0015                           | 0.0306    | 0.1135                           | 0.0024    | 0.0304                            | 0.0006    | 750                               | 50        | 705                              | 16        | 693                              | 14        |
| 11            | 0.39 | 2.9789                           | 0.0789    | 0.2448                           | 0.0052    | 0.0703                            | 0.0014    | 1303                              | 40        | 1402                             | 20        | 1412                             | 27        |
| 12            | 0.24 | 6.0282                           | 0.1736    | 0.3398                           | 0.0072    | 0.1125                            | 0.0023    | 2088                              | 36        | 1980                             | 25        | 1886                             | 35        |
| 13            | 0.76 | 0.3984                           | 0.0107    | 0.0528                           | 0.0011    | 0.0153                            | 0.0003    | 435                               | 52        | 341                              | 8         | 332                              | 7         |
| 14            | 0.72 | 1.2305                           | 0.0295    | 0.1398                           | 0.0030    | 0.0428                            | 0.0008    | 754                               | 44        | 815                              | 13        | 844                              | 17        |
| 15            | 0.80 | 1.3017                           | 0.0370    | 0.1421                           | 0.0030    | 0.0420                            | 0.0008    | 782                               | 47        | 847                              | 16        | 857                              | 17        |
| 16            | 1.11 | 1.4028                           | 0.1657    | 0.1509                           | 0.0042    | 0.0531                            | 0.0017    | 838                               | 130       | 890                              | 70        | 906                              | 23        |
| 17            | 0.71 | 4.2449                           | 0.0987    | 0.2983                           | 0.0063    | 0.0845                            | 0.0016    | 1700                              | 37        | 1683                             | 19        | 1683                             | 31        |
| 18            | 1.23 | 1.3712                           | 0.0392    | 0.1394                           | 0.0030    | 0.0455                            | 0.0009    | 995                               | 45        | 877                              | 17        | 841                              | 17        |
| 19            | 1.12 | 1.1269                           | 0.0357    | 0.1330                           | 0.0028    | 0.0396                            | 0.0008    | 803                               | 50        | 766                              | 17        | 805                              | 16        |

|    |      |         |        |        |        |        |        |      |    |      |    |      |    |
|----|------|---------|--------|--------|--------|--------|--------|------|----|------|----|------|----|
| 20 | 0.45 | 0.6385  | 0.0139 | 0.0687 | 0.0015 | 0.0269 | 0.0005 | 911  | 42 | 501  | 9  | 428  | 9  |
| 21 | 0.50 | 0.5206  | 0.0120 | 0.0687 | 0.0015 | 0.0208 | 0.0004 | 425  | 46 | 426  | 8  | 428  | 9  |
| 22 | 1.41 | 1.1111  | 0.0434 | 0.1239 | 0.0027 | 0.0355 | 0.0007 | 811  | 57 | 759  | 21 | 753  | 15 |
| 23 | 0.21 | 5.5400  | 0.1348 | 0.3532 | 0.0074 | 0.1005 | 0.0019 | 1842 | 36 | 1907 | 21 | 1950 | 35 |
| 24 | 0.72 | 0.2827  | 0.0068 | 0.0352 | 0.0007 | 0.0110 | 0.0002 | 546  | 48 | 253  | 5  | 223  | 5  |
| 25 | 0.22 | 0.8959  | 0.0199 | 0.0847 | 0.0018 | 0.0489 | 0.0009 | 1109 | 41 | 650  | 11 | 524  | 11 |
| 26 | 0.42 | 0.2781  | 0.0074 | 0.0362 | 0.0008 | 0.0121 | 0.0002 | 433  | 53 | 249  | 6  | 229  | 5  |
| 27 | 0.80 | 1.2868  | 0.0390 | 0.1391 | 0.0030 | 0.0412 | 0.0008 | 815  | 48 | 840  | 17 | 839  | 17 |
| 28 | 0.74 | 9.9952  | 0.2341 | 0.4590 | 0.0096 | 0.1218 | 0.0022 | 2433 | 33 | 2434 | 22 | 2435 | 43 |
| 29 | 0.44 | 0.5845  | 0.0158 | 0.0753 | 0.0016 | 0.0241 | 0.0005 | 457  | 51 | 467  | 10 | 468  | 10 |
| 30 | 0.36 | 0.3140  | 0.0077 | 0.0354 | 0.0008 | 0.0144 | 0.0003 | 783  | 47 | 277  | 6  | 225  | 5  |
| 31 | 7.56 | 4.8335  | 0.1828 | 0.3223 | 0.0069 | 0.0947 | 0.0017 | 1822 | 40 | 1791 | 32 | 1801 | 34 |
| 32 | 0.81 | 1.1958  | 0.0599 | 0.1382 | 0.0031 | 0.0434 | 0.0010 | 734  | 68 | 799  | 28 | 834  | 17 |
| 33 | 0.75 | 0.5732  | 0.0155 | 0.0611 | 0.0013 | 0.0225 | 0.0004 | 881  | 48 | 460  | 10 | 383  | 8  |
| 34 | 0.84 | 0.5549  | 0.0155 | 0.0713 | 0.0015 | 0.0235 | 0.0005 | 555  | 52 | 448  | 10 | 444  | 9  |
| 35 | 0.92 | 0.5567  | 0.0136 | 0.0741 | 0.0016 | 0.0225 | 0.0004 | 400  | 48 | 449  | 9  | 461  | 9  |
| 36 | 1.79 | 1.3659  | 0.0436 | 0.1460 | 0.0031 | 0.0419 | 0.0008 | 760  | 49 | 874  | 19 | 879  | 17 |
| 37 | 0.45 | 0.2456  | 0.0062 | 0.0354 | 0.0008 | 0.0112 | 0.0002 | 261  | 53 | 223  | 5  | 224  | 5  |
| 38 | 0.68 | 1.2257  | 0.0360 | 0.1382 | 0.0029 | 0.0404 | 0.0008 | 758  | 48 | 812  | 16 | 834  | 17 |
| 39 | 0.43 | 14.1957 | 0.3290 | 0.5375 | 0.0112 | 0.1443 | 0.0027 | 2728 | 32 | 2763 | 22 | 2773 | 47 |
| 40 | 0.59 | 0.9702  | 0.0287 | 0.1107 | 0.0023 | 0.0331 | 0.0007 | 695  | 50 | 689  | 15 | 677  | 14 |
| 41 | 1.02 | 0.6378  | 0.0152 | 0.0665 | 0.0014 | 0.0220 | 0.0004 | 934  | 44 | 501  | 9  | 415  | 8  |



|    |      |         |        |        |        |        |        |      |    |      |    |      |    |
|----|------|---------|--------|--------|--------|--------|--------|------|----|------|----|------|----|
| 42 | 0.83 | 1.1355  | 0.0346 | 0.1296 | 0.0027 | 0.0391 | 0.0008 | 691  | 50 | 770  | 16 | 786  | 16 |
| 43 | 0.56 | 1.4565  | 0.0387 | 0.1553 | 0.0033 | 0.0461 | 0.0009 | 896  | 44 | 913  | 16 | 930  | 18 |
| 44 | 0.60 | 1.1205  | 0.0351 | 0.1255 | 0.0027 | 0.0386 | 0.0008 | 807  | 50 | 763  | 17 | 762  | 15 |
| 45 | 1.84 | 1.1824  | 0.0310 | 0.1367 | 0.0029 | 0.0420 | 0.0008 | 710  | 46 | 792  | 14 | 826  | 16 |
| 46 | 0.97 | 0.3528  | 0.0106 | 0.0472 | 0.0010 | 0.0143 | 0.0003 | 361  | 59 | 307  | 8  | 297  | 6  |
| 47 | 0.58 | 1.3090  | 0.0360 | 0.1356 | 0.0029 | 0.0420 | 0.0008 | 916  | 45 | 850  | 16 | 820  | 16 |
| 48 | 0.91 | 2.0566  | 0.0608 | 0.1995 | 0.0042 | 0.0549 | 0.0010 | 1030 | 44 | 1135 | 20 | 1172 | 23 |
| 49 | 0.30 | 0.6192  | 0.0154 | 0.0811 | 0.0017 | 0.0255 | 0.0005 | 397  | 49 | 489  | 10 | 503  | 10 |
| 50 | 0.84 | 4.7558  | 0.2243 | 0.3138 | 0.0068 | 0.1008 | 0.0020 | 1813 | 43 | 1777 | 40 | 1759 | 33 |
| 51 | 0.24 | 0.5537  | 0.0124 | 0.0760 | 0.0016 | 0.0236 | 0.0005 | 388  | 46 | 447  | 8  | 472  | 9  |
| 52 | 0.55 | 1.3022  | 0.0320 | 0.1445 | 0.0030 | 0.0426 | 0.0008 | 821  | 44 | 847  | 14 | 870  | 17 |
| 53 | 0.53 | 0.2779  | 0.0083 | 0.0389 | 0.0008 | 0.0121 | 0.0003 | 276  | 61 | 249  | 7  | 246  | 5  |
| 54 | 1.15 | 1.1580  | 0.0327 | 0.1293 | 0.0027 | 0.0380 | 0.0007 | 711  | 48 | 781  | 15 | 784  | 16 |
| 55 | 0.69 | 10.8373 | 0.2720 | 0.4793 | 0.0100 | 0.1315 | 0.0024 | 2462 | 34 | 2509 | 23 | 2524 | 44 |
| 56 | 0.45 | 12.3049 | 0.2998 | 0.5023 | 0.0105 | 0.1358 | 0.0025 | 2627 | 33 | 2628 | 23 | 2624 | 45 |
| 57 | 0.12 | 5.6519  | 0.1251 | 0.3474 | 0.0072 | 0.1025 | 0.0019 | 1948 | 35 | 1924 | 19 | 1922 | 35 |
| 58 | 0.87 | 0.7393  | 0.0193 | 0.0905 | 0.0019 | 0.0273 | 0.0005 | 565  | 49 | 562  | 11 | 559  | 11 |
| 59 | 0.88 | 1.1333  | 0.0372 | 0.1295 | 0.0027 | 0.0375 | 0.0007 | 757  | 51 | 769  | 18 | 785  | 16 |
| 60 | 0.57 | 5.3600  | 0.1482 | 0.3388 | 0.0071 | 0.0953 | 0.0018 | 1821 | 37 | 1879 | 24 | 1881 | 34 |
| 61 | 0.42 | 0.3148  | 0.0091 | 0.0359 | 0.0008 | 0.0139 | 0.0003 | 733  | 54 | 278  | 7  | 227  | 5  |
| 62 | 0.08 | 4.7889  | 0.1529 | 0.3140 | 0.0066 | 0.0901 | 0.0019 | 1811 | 38 | 1783 | 27 | 1760 | 32 |
| 63 | 0.19 | 5.7599  | 0.1226 | 0.3600 | 0.0075 | 0.1200 | 0.0022 | 1907 | 35 | 1940 | 18 | 1982 | 35 |

|    |      |         |        |        |        |        |        |      |    |      |     |      |    |
|----|------|---------|--------|--------|--------|--------|--------|------|----|------|-----|------|----|
| 64 | 0.13 | 0.6843  | 0.0145 | 0.0760 | 0.0016 | 0.0397 | 0.0007 | 821  | 42 | 529  | 9   | 472  | 9  |
| 65 | 1.01 | 1.1261  | 0.0352 | 0.1295 | 0.0027 | 0.0391 | 0.0007 | 713  | 50 | 766  | 17  | 785  | 16 |
| 66 | 0.16 | 1.2703  | 0.0321 | 0.1401 | 0.0029 | 0.0458 | 0.0009 | 797  | 45 | 833  | 14  | 845  | 17 |
| 67 | 0.50 | 9.7831  | 0.2647 | 0.4551 | 0.0095 | 0.1199 | 0.0022 | 2425 | 34 | 2415 | 25  | 2418 | 42 |
| 68 | 0.70 | 12.4212 | 0.4019 | 0.5066 | 0.0106 | 0.1351 | 0.0025 | 2677 | 34 | 2637 | 30  | 2642 | 45 |
| 69 | 0.51 | 7.6878  | 1.0907 | 0.3962 | 0.0113 | 0.1569 | 0.0060 | 2623 | 69 | 2195 | 127 | 2152 | 52 |
| 70 | 0.71 | 1.1614  | 0.0442 | 0.1359 | 0.0029 | 0.0394 | 0.0008 | 708  | 56 | 783  | 21  | 821  | 16 |
| 71 | 0.28 | 2.1528  | 0.0528 | 0.1998 | 0.0041 | 0.0606 | 0.0011 | 1157 | 41 | 1166 | 17  | 1174 | 22 |
| 72 | 1.39 | 5.6113  | 0.1971 | 0.3515 | 0.0074 | 0.0979 | 0.0018 | 2001 | 38 | 1918 | 30  | 1942 | 35 |
| 73 | 1.28 | 1.2550  | 0.0432 | 0.1374 | 0.0029 | 0.0401 | 0.0008 | 815  | 52 | 826  | 19  | 830  | 16 |
| 74 | 0.64 | 10.5328 | 0.3937 | 0.4648 | 0.0098 | 0.1275 | 0.0025 | 2525 | 35 | 2483 | 35  | 2461 | 43 |
| 75 | 0.67 | 9.8235  | 0.2851 | 0.4596 | 0.0096 | 0.1303 | 0.0024 | 2510 | 34 | 2418 | 27  | 2438 | 42 |
| 76 | 0.40 | 0.6020  | 0.0128 | 0.0734 | 0.0015 | 0.0232 | 0.0004 | 623  | 44 | 479  | 8   | 457  | 9  |
| 77 | 0.79 | 0.5547  | 0.0149 | 0.0715 | 0.0015 | 0.0217 | 0.0004 | 448  | 51 | 448  | 10  | 445  | 9  |
| 78 | 1.20 | 0.7233  | 0.0236 | 0.0924 | 0.0020 | 0.0286 | 0.0005 | 575  | 56 | 553  | 14  | 569  | 11 |
| 79 | 0.24 | 1.4650  | 0.0362 | 0.1518 | 0.0032 | 0.0438 | 0.0008 | 923  | 43 | 916  | 15  | 911  | 18 |
| 80 | 0.36 | 5.3961  | 0.1206 | 0.3481 | 0.0072 | 0.1075 | 0.0019 | 1867 | 36 | 1884 | 19  | 1925 | 34 |
| 81 | 0.26 | 10.4710 | 0.2536 | 0.4668 | 0.0096 | 0.1331 | 0.0025 | 2482 | 34 | 2477 | 22  | 2470 | 42 |
| 82 | 1.00 | 9.6723  | 0.2528 | 0.4513 | 0.0093 | 0.1173 | 0.0021 | 2433 | 34 | 2404 | 24  | 2401 | 41 |
| 83 | 1.43 | 0.4409  | 0.0166 | 0.0443 | 0.0010 | 0.0142 | 0.0003 | 1085 | 61 | 371  | 12  | 280  | 6  |
| 84 | 0.75 | 1.2221  | 0.0311 | 0.1328 | 0.0028 | 0.0406 | 0.0008 | 813  | 45 | 811  | 14  | 804  | 16 |
| 85 | 1.10 | 0.5810  | 0.0145 | 0.0589 | 0.0012 | 0.0187 | 0.0003 | 963  | 45 | 465  | 9   | 369  | 7  |

|     |      |         |        |        |        |        |        |      |    |      |    |      |    |
|-----|------|---------|--------|--------|--------|--------|--------|------|----|------|----|------|----|
| 86  | 0.65 | 0.8462  | 0.0246 | 0.1054 | 0.0022 | 0.0315 | 0.0006 | 669  | 50 | 623  | 14 | 646  | 13 |
| 87  | 0.20 | 5.4163  | 0.1335 | 0.3425 | 0.0071 | 0.0949 | 0.0018 | 1858 | 36 | 1887 | 21 | 1899 | 34 |
| 88  | 0.66 | 5.0034  | 0.1242 | 0.3258 | 0.0067 | 0.0897 | 0.0016 | 1831 | 37 | 1820 | 21 | 1818 | 33 |
| 89  | 0.47 | 0.7050  | 0.0174 | 0.0520 | 0.0011 | 0.0288 | 0.0005 | 1611 | 41 | 542  | 10 | 327  | 7  |
| 90  | 0.25 | 1.6580  | 0.0376 | 0.1726 | 0.0036 | 0.0470 | 0.0009 | 939  | 42 | 993  | 14 | 1026 | 20 |
| 91  | 1.45 | 1.6149  | 0.0388 | 0.1673 | 0.0035 | 0.0489 | 0.0009 | 939  | 43 | 976  | 15 | 997  | 19 |
| 92  | 1.53 | 1.1992  | 0.0608 | 0.1387 | 0.0030 | 0.0422 | 0.0009 | 808  | 67 | 800  | 28 | 838  | 17 |
| 93  | 1.63 | 1.0163  | 0.0345 | 0.1189 | 0.0025 | 0.0369 | 0.0007 | 666  | 54 | 712  | 17 | 724  | 14 |
| 94  | 0.77 | 0.5544  | 0.0206 | 0.0709 | 0.0015 | 0.0212 | 0.0004 | 480  | 65 | 448  | 13 | 442  | 9  |
| 95  | 0.44 | 1.6010  | 0.0362 | 0.1658 | 0.0034 | 0.0470 | 0.0009 | 965  | 42 | 971  | 14 | 989  | 19 |
| 96  | 0.89 | 6.6057  | 0.2479 | 0.3756 | 0.0078 | 0.1036 | 0.0019 | 1998 | 38 | 2060 | 33 | 2056 | 37 |
| 97  | 0.57 | 1.4682  | 0.0494 | 0.1620 | 0.0034 | 0.0462 | 0.0009 | 895  | 50 | 917  | 20 | 968  | 19 |
| 98  | 0.63 | 1.2158  | 0.0418 | 0.1166 | 0.0024 | 0.0400 | 0.0008 | 1013 | 51 | 808  | 19 | 711  | 14 |
| 99  | 0.47 | 0.2468  | 0.0063 | 0.0353 | 0.0007 | 0.0113 | 0.0002 | 263  | 54 | 224  | 5  | 224  | 5  |
| 100 | 0.99 | 0.7813  | 0.0192 | 0.0905 | 0.0019 | 0.0252 | 0.0005 | 713  | 46 | 586  | 11 | 559  | 11 |
| 101 | 0.53 | 0.5183  | 0.0130 | 0.0688 | 0.0014 | 0.0201 | 0.0004 | 437  | 50 | 424  | 9  | 429  | 9  |
| 102 | 0.89 | 0.6180  | 0.0136 | 0.0734 | 0.0015 | 0.0234 | 0.0004 | 644  | 45 | 489  | 9  | 457  | 9  |
| 103 | 0.49 | 0.2429  | 0.0061 | 0.0348 | 0.0007 | 0.0107 | 0.0002 | 217  | 54 | 221  | 5  | 220  | 4  |
| 104 | 0.38 | 10.6689 | 0.2431 | 0.4682 | 0.0096 | 0.1302 | 0.0023 | 2529 | 33 | 2495 | 21 | 2476 | 42 |
| 105 | 0.60 | 1.1620  | 0.0533 | 0.1258 | 0.0027 | 0.0379 | 0.0009 | 853  | 63 | 783  | 25 | 764  | 15 |
| 106 | 0.80 | 1.1360  | 0.0470 | 0.1259 | 0.0027 | 0.0370 | 0.0008 | 751  | 60 | 771  | 22 | 765  | 15 |
| 107 | 0.91 | 1.2640  | 0.0328 | 0.1412 | 0.0029 | 0.0401 | 0.0007 | 816  | 45 | 830  | 15 | 851  | 16 |

|     |      |        |        |        |        |        |        |      |     |      |     |      |    |
|-----|------|--------|--------|--------|--------|--------|--------|------|-----|------|-----|------|----|
| 108 | 0.11 | 2.1947 | 0.0451 | 0.1577 | 0.0032 | 0.0615 | 0.0011 | 1675 | 37  | 1179 | 14  | 944  | 18 |
| 109 | 0.62 | 0.2424 | 0.0070 | 0.0348 | 0.0007 | 0.0108 | 0.0002 | 312  | 59  | 220  | 6   | 220  | 5  |
| 110 | 0.40 | 0.5559 | 0.0131 | 0.0336 | 0.0007 | 0.0246 | 0.0005 | 2000 | 39  | 449  | 9   | 213  | 4  |
| 111 | 0.71 | 1.0895 | 0.2372 | 0.1169 | 0.0054 | 0.0258 | 0.0026 | 1510 | 225 | 748  | 115 | 713  | 31 |
| 112 | 0.67 | 0.5479 | 0.0141 | 0.0714 | 0.0015 | 0.0215 | 0.0004 | 434  | 50  | 444  | 9   | 445  | 9  |
| 113 | 0.54 | 0.2472 | 0.0064 | 0.0362 | 0.0008 | 0.0110 | 0.0002 | 193  | 56  | 224  | 5   | 229  | 5  |
| 114 | 0.55 | 1.1944 | 0.0361 | 0.1311 | 0.0027 | 0.0393 | 0.0008 | 819  | 49  | 798  | 17  | 794  | 15 |
| 115 | 0.84 | 1.3175 | 0.0312 | 0.1433 | 0.0029 | 0.0473 | 0.0008 | 822  | 44  | 853  | 14  | 863  | 17 |
| 116 | 0.12 | 0.3034 | 0.0064 | 0.0359 | 0.0007 | 0.0196 | 0.0004 | 682  | 44  | 269  | 5   | 227  | 5  |
| 117 | 0.39 | 1.4400 | 0.0313 | 0.1483 | 0.0030 | 0.0466 | 0.0008 | 972  | 41  | 906  | 13  | 891  | 17 |
| 118 | 0.73 | 1.9712 | 0.0427 | 0.1887 | 0.0038 | 0.0572 | 0.0010 | 1118 | 40  | 1106 | 15  | 1115 | 21 |
| 119 | 0.99 | 0.3141 | 0.0081 | 0.0434 | 0.0009 | 0.0137 | 0.0003 | 300  | 54  | 277  | 6   | 274  | 6  |
| 120 | 0.54 | 0.5476 | 0.0151 | 0.0720 | 0.0015 | 0.0216 | 0.0004 | 419  | 52  | 443  | 10  | 448  | 9  |

---

**Z2**

| Analysis spot | Th/U | $^{207}\text{Pb}/^{235}\text{U}$ | $1\sigma$ | $^{206}\text{Pb}/^{238}\text{U}$ | $1\sigma$ | $^{208}\text{Pb}/^{232}\text{Th}$ | $1\sigma$ | $^{207}\text{Pb}/^{206}\text{Pb}$ | $1\sigma$ | $^{207}\text{Pb}/^{235}\text{U}$ | $1\sigma$ | $^{206}\text{Pb}/^{238}\text{U}$ | $1\sigma$ |
|---------------|------|----------------------------------|-----------|----------------------------------|-----------|-----------------------------------|-----------|-----------------------------------|-----------|----------------------------------|-----------|----------------------------------|-----------|
| 1             | 0.87 | 1.1855                           | 0.0483    | 0.1335                           | 0.0027    | 0.0438                            | 0.0009    | 732                               | 59        | 794                              | 22        | 808                              | 16        |
| 2             | 1.44 | 0.5378                           | 0.0175    | 0.0712                           | 0.0014    | 0.0227                            | 0.0004    | 359                               | 60        | 437                              | 12        | 444                              | 9         |
| 3             | 0.82 | 21.2401                          | 0.5169    | 0.6277                           | 0.0124    | 0.1627                            | 0.0029    | 3094                              | 32        | 3150                             | 24        | 3140                             | 49        |
| 4             | 0.81 | 0.5491                           | 0.0141    | 0.0724                           | 0.0014    | 0.0222                            | 0.0004    | 427                               | 50        | 444                              | 9         | 451                              | 9         |
| 5             | 0.39 | 0.2423                           | 0.0071    | 0.0348                           | 0.0007    | 0.0110                            | 0.0002    | 165                               | 62        | 220                              | 6         | 221                              | 4         |
| 6             | 0.84 | 10.7364                          | 0.2943    | 0.4743                           | 0.0094    | 0.1342                            | 0.0025    | 2461                              | 34        | 2501                             | 25        | 2503                             | 41        |

|    |      |        |        |        |        |        |        |      |    |      |    |      |    |
|----|------|--------|--------|--------|--------|--------|--------|------|----|------|----|------|----|
| 7  | 1.20 | 1.1458 | 0.0416 | 0.1246 | 0.0025 | 0.0353 | 0.0007 | 737  | 55 | 775  | 20 | 757  | 14 |
| 8  | 1.07 | 1.2234 | 0.0425 | 0.1312 | 0.0027 | 0.0399 | 0.0008 | 816  | 52 | 811  | 19 | 795  | 15 |
| 9  | 0.24 | 5.3458 | 0.1200 | 0.3396 | 0.0067 | 0.0952 | 0.0017 | 1835 | 36 | 1876 | 19 | 1885 | 32 |
| 10 | 0.95 | 0.9836 | 0.0225 | 0.0697 | 0.0014 | 0.0297 | 0.0005 | 1631 | 39 | 695  | 12 | 435  | 8  |
| 11 | 0.77 | 1.2478 | 0.0550 | 0.1344 | 0.0028 | 0.0410 | 0.0009 | 735  | 61 | 822  | 25 | 813  | 16 |
| 12 | 1.62 | 2.5789 | 0.0554 | 0.2232 | 0.0044 | 0.0633 | 0.0011 | 1278 | 39 | 1295 | 16 | 1299 | 23 |
| 13 | 0.40 | 0.2448 | 0.0069 | 0.0347 | 0.0007 | 0.0109 | 0.0002 | 264  | 59 | 222  | 6  | 220  | 4  |
| 14 | 0.66 | 1.4061 | 0.0418 | 0.1185 | 0.0024 | 0.0459 | 0.0009 | 1330 | 44 | 892  | 18 | 722  | 14 |
| 15 | 0.40 | 0.2583 | 0.0080 | 0.0353 | 0.0007 | 0.0118 | 0.0003 | 298  | 63 | 233  | 6  | 224  | 4  |
| 16 | 0.89 | 1.0997 | 0.0313 | 0.1248 | 0.0025 | 0.0389 | 0.0007 | 717  | 48 | 753  | 15 | 758  | 14 |
| 17 | 1.05 | 1.2611 | 0.0535 | 0.1392 | 0.0029 | 0.0427 | 0.0009 | 805  | 59 | 828  | 24 | 840  | 16 |
| 18 | 0.28 | 0.2459 | 0.0065 | 0.0350 | 0.0007 | 0.0114 | 0.0002 | 230  | 56 | 223  | 5  | 221  | 4  |
| 19 | 0.43 | 0.2905 | 0.0082 | 0.0339 | 0.0007 | 0.0130 | 0.0003 | 665  | 54 | 259  | 6  | 215  | 4  |
| 20 | 0.84 | 0.5269 | 0.0145 | 0.0699 | 0.0014 | 0.0213 | 0.0004 | 377  | 53 | 430  | 10 | 435  | 8  |
| 21 | 0.88 | 0.5343 | 0.0174 | 0.0688 | 0.0014 | 0.0216 | 0.0004 | 519  | 59 | 435  | 12 | 429  | 8  |
| 22 | 1.51 | 0.5148 | 0.0122 | 0.0683 | 0.0014 | 0.0207 | 0.0004 | 385  | 49 | 422  | 8  | 426  | 8  |
| 23 | 0.92 | 0.6928 | 0.0171 | 0.0864 | 0.0017 | 0.0269 | 0.0005 | 509  | 49 | 535  | 10 | 534  | 10 |
| 24 | 0.42 | 0.4075 | 0.0111 | 0.0333 | 0.0007 | 0.0179 | 0.0004 | 1393 | 46 | 347  | 8  | 211  | 4  |
| 25 | 0.48 | 1.5741 | 0.0372 | 0.1488 | 0.0030 | 0.0450 | 0.0008 | 1078 | 42 | 960  | 15 | 894  | 17 |
| 26 | 1.17 | 1.1294 | 0.0303 | 0.1272 | 0.0025 | 0.0375 | 0.0007 | 748  | 47 | 768  | 14 | 772  | 15 |
| 27 | 0.38 | 0.5099 | 0.0127 | 0.0650 | 0.0013 | 0.0201 | 0.0004 | 441  | 50 | 418  | 9  | 406  | 8  |
| 28 | 0.58 | 0.2604 | 0.0069 | 0.0362 | 0.0007 | 0.0117 | 0.0002 | 253  | 56 | 235  | 6  | 230  | 5  |

|    |      |         |        |        |        |        |        |      |    |      |    |      |    |
|----|------|---------|--------|--------|--------|--------|--------|------|----|------|----|------|----|
| 29 | 0.95 | 1.1635  | 0.0427 | 0.1282 | 0.0026 | 0.0395 | 0.0008 | 776  | 55 | 784  | 20 | 778  | 15 |
| 30 | 0.72 | 2.1406  | 0.0558 | 0.1972 | 0.0039 | 0.0582 | 0.0011 | 1156 | 42 | 1162 | 18 | 1160 | 21 |
| 31 | 1.09 | 1.2411  | 0.0278 | 0.1321 | 0.0026 | 0.0406 | 0.0007 | 875  | 42 | 819  | 13 | 800  | 15 |
| 32 | 0.60 | 0.4767  | 0.0140 | 0.0348 | 0.0007 | 0.0166 | 0.0003 | 1662 | 47 | 396  | 10 | 221  | 4  |
| 33 | 0.94 | 1.1451  | 0.0340 | 0.1315 | 0.0026 | 0.0404 | 0.0008 | 738  | 49 | 775  | 16 | 796  | 15 |
| 34 | 1.04 | 1.8505  | 0.0504 | 0.1786 | 0.0036 | 0.0536 | 0.0010 | 1072 | 43 | 1064 | 18 | 1059 | 20 |
| 35 | 0.56 | 10.5572 | 0.2501 | 0.4706 | 0.0093 | 0.1283 | 0.0023 | 2486 | 34 | 2485 | 22 | 2486 | 41 |
| 36 | 0.48 | 0.2570  | 0.0068 | 0.0360 | 0.0007 | 0.0113 | 0.0002 | 243  | 56 | 232  | 6  | 228  | 5  |
| 37 | 0.47 | 0.8338  | 0.0220 | 0.0949 | 0.0019 | 0.0318 | 0.0006 | 721  | 48 | 616  | 12 | 585  | 11 |
| 38 | 0.78 | 1.3257  | 0.0291 | 0.1115 | 0.0022 | 0.0267 | 0.0005 | 1328 | 40 | 857  | 13 | 681  | 13 |
| 39 | 0.66 | 0.5981  | 0.0157 | 0.0762 | 0.0015 | 0.0220 | 0.0004 | 418  | 51 | 476  | 10 | 473  | 9  |
| 40 | 0.71 | 1.1235  | 0.0394 | 0.1238 | 0.0025 | 0.0388 | 0.0008 | 761  | 54 | 765  | 19 | 753  | 14 |
| 41 | 0.71 | 1.4578  | 0.0375 | 0.1491 | 0.0030 | 0.0453 | 0.0008 | 913  | 44 | 913  | 16 | 896  | 17 |
| 42 | 1.97 | 1.1067  | 0.0366 | 0.1156 | 0.0023 | 0.0318 | 0.0006 | 870  | 51 | 757  | 18 | 705  | 14 |
| 43 | 1.27 | 1.1004  | 0.0249 | 0.1184 | 0.0024 | 0.0345 | 0.0006 | 828  | 43 | 754  | 12 | 722  | 14 |
| 44 | 0.72 | 1.3012  | 0.0414 | 0.1328 | 0.0027 | 0.0392 | 0.0008 | 854  | 49 | 846  | 18 | 804  | 15 |
| 45 | 0.90 | 1.1526  | 0.0611 | 0.1321 | 0.0028 | 0.0400 | 0.0009 | 753  | 71 | 779  | 29 | 800  | 16 |
| 46 | 0.70 | 1.2133  | 0.0419 | 0.1325 | 0.0027 | 0.0395 | 0.0008 | 769  | 53 | 807  | 19 | 802  | 15 |
| 47 | 0.55 | 0.4043  | 0.0117 | 0.0481 | 0.0010 | 0.0158 | 0.0003 | 683  | 54 | 345  | 8  | 303  | 6  |
| 48 | 0.34 | 0.2391  | 0.0063 | 0.0342 | 0.0007 | 0.0104 | 0.0002 | 206  | 56 | 218  | 5  | 217  | 4  |
| 49 | 0.86 | 1.5547  | 0.0350 | 0.1588 | 0.0032 | 0.0490 | 0.0009 | 935  | 42 | 952  | 14 | 950  | 18 |
| 50 | 0.80 | 1.2964  | 0.0337 | 0.1409 | 0.0028 | 0.0438 | 0.0008 | 812  | 45 | 844  | 15 | 850  | 16 |

|    |      |         |        |        |        |        |        |      |    |      |    |      |    |
|----|------|---------|--------|--------|--------|--------|--------|------|----|------|----|------|----|
| 51 | 0.39 | 2.7702  | 0.0587 | 0.2207 | 0.0044 | 0.0739 | 0.0013 | 1416 | 38 | 1348 | 16 | 1286 | 23 |
| 52 | 0.79 | 1.2559  | 0.0333 | 0.1235 | 0.0025 | 0.0396 | 0.0007 | 974  | 45 | 826  | 15 | 751  | 14 |
| 53 | 0.29 | 5.3477  | 0.1259 | 0.3388 | 0.0068 | 0.0953 | 0.0017 | 1849 | 36 | 1877 | 20 | 1881 | 33 |
| 54 | 0.50 | 1.2570  | 0.0320 | 0.1354 | 0.0027 | 0.0408 | 0.0008 | 812  | 45 | 827  | 14 | 819  | 15 |
| 55 | 0.76 | 6.4130  | 0.1740 | 0.3678 | 0.0074 | 0.1044 | 0.0019 | 1996 | 36 | 2034 | 24 | 2019 | 35 |
| 56 | 0.97 | 1.0333  | 0.0400 | 0.1228 | 0.0025 | 0.0363 | 0.0007 | 644  | 59 | 721  | 20 | 747  | 14 |
| 57 | 0.47 | 1.5212  | 0.0349 | 0.1556 | 0.0031 | 0.0465 | 0.0008 | 919  | 42 | 939  | 14 | 932  | 17 |
| 58 | 0.52 | 0.2370  | 0.0071 | 0.0348 | 0.0007 | 0.0103 | 0.0002 | 145  | 63 | 216  | 6  | 220  | 4  |
| 59 | 0.57 | 1.1755  | 0.0298 | 0.1313 | 0.0026 | 0.0397 | 0.0007 | 765  | 45 | 789  | 14 | 795  | 15 |
| 60 | 0.79 | 1.2056  | 0.0397 | 0.1328 | 0.0027 | 0.0402 | 0.0008 | 732  | 52 | 803  | 18 | 804  | 15 |
| 61 | 1.80 | 1.6504  | 0.0402 | 0.1639 | 0.0033 | 0.0478 | 0.0009 | 998  | 43 | 990  | 15 | 978  | 18 |
| 62 | 0.66 | 1.5278  | 0.0383 | 0.1402 | 0.0028 | 0.0388 | 0.0007 | 1182 | 42 | 942  | 15 | 846  | 16 |
| 63 | 0.87 | 1.2211  | 0.0361 | 0.1293 | 0.0026 | 0.0397 | 0.0007 | 794  | 48 | 810  | 17 | 784  | 15 |
| 64 | 1.58 | 1.0684  | 0.0312 | 0.1186 | 0.0024 | 0.0352 | 0.0006 | 758  | 49 | 738  | 15 | 722  | 14 |
| 65 | 0.67 | 1.0440  | 0.0222 | 0.0978 | 0.0020 | 0.0298 | 0.0005 | 1139 | 40 | 726  | 11 | 601  | 11 |
| 66 | 0.73 | 1.6023  | 0.0447 | 0.1473 | 0.0030 | 0.0475 | 0.0009 | 1114 | 44 | 971  | 17 | 886  | 17 |
| 67 | 0.74 | 0.9125  | 0.0234 | 0.1054 | 0.0021 | 0.0316 | 0.0006 | 655  | 47 | 658  | 12 | 646  | 12 |
| 68 | 0.89 | 10.9720 | 0.2736 | 0.4771 | 0.0095 | 0.1307 | 0.0023 | 2500 | 34 | 2521 | 23 | 2515 | 42 |
| 69 | 0.44 | 0.2328  | 0.0070 | 0.0346 | 0.0007 | 0.0108 | 0.0002 | 171  | 63 | 213  | 6  | 219  | 4  |
| 70 | 0.36 | 0.5979  | 0.0152 | 0.0717 | 0.0014 | 0.0218 | 0.0004 | 631  | 49 | 476  | 10 | 446  | 9  |
| 71 | 1.51 | 1.1983  | 0.0279 | 0.1324 | 0.0027 | 0.0383 | 0.0007 | 816  | 44 | 800  | 13 | 802  | 15 |
| 72 | 1.57 | 1.2063  | 0.0403 | 0.1312 | 0.0027 | 0.0386 | 0.0007 | 790  | 52 | 804  | 19 | 795  | 15 |

|    |      |        |        |        |        |        |        |      |    |      |    |      |    |
|----|------|--------|--------|--------|--------|--------|--------|------|----|------|----|------|----|
| 73 | 0.69 | 0.8683 | 0.0335 | 0.1071 | 0.0022 | 0.0318 | 0.0007 | 624  | 61 | 635  | 18 | 656  | 13 |
| 74 | 0.55 | 0.6998 | 0.0170 | 0.0871 | 0.0018 | 0.0257 | 0.0005 | 516  | 48 | 539  | 10 | 538  | 10 |
| 75 | 0.32 | 2.5751 | 0.0776 | 0.2170 | 0.0044 | 0.0663 | 0.0013 | 1251 | 43 | 1294 | 22 | 1266 | 23 |
| 76 | 0.51 | 1.2392 | 0.0299 | 0.1270 | 0.0026 | 0.0410 | 0.0008 | 936  | 43 | 819  | 14 | 771  | 15 |
| 77 | 0.50 | 0.2548 | 0.0076 | 0.0348 | 0.0007 | 0.0105 | 0.0002 | 289  | 61 | 230  | 6  | 220  | 4  |
| 78 | 0.96 | 1.0993 | 0.0450 | 0.1239 | 0.0026 | 0.0393 | 0.0008 | 776  | 59 | 753  | 22 | 753  | 15 |
| 79 | 0.47 | 1.5986 | 0.0409 | 0.1618 | 0.0033 | 0.0482 | 0.0009 | 979  | 44 | 970  | 16 | 967  | 18 |
| 80 | 0.89 | 1.2547 | 0.0368 | 0.1322 | 0.0027 | 0.0401 | 0.0008 | 838  | 48 | 826  | 17 | 800  | 15 |
| 81 | 1.22 | 1.1282 | 0.0317 | 0.1247 | 0.0025 | 0.0371 | 0.0007 | 788  | 48 | 767  | 15 | 758  | 14 |
| 82 | 1.11 | 1.1700 | 0.0388 | 0.1264 | 0.0026 | 0.0361 | 0.0007 | 883  | 51 | 787  | 18 | 767  | 15 |
| 83 | 0.78 | 1.2401 | 0.0286 | 0.1315 | 0.0026 | 0.0395 | 0.0007 | 863  | 43 | 819  | 13 | 797  | 15 |
| 84 | 0.58 | 1.4142 | 0.0375 | 0.1455 | 0.0029 | 0.0437 | 0.0008 | 898  | 45 | 895  | 16 | 876  | 16 |
| 85 | 0.92 | 0.5309 | 0.0153 | 0.0692 | 0.0014 | 0.0202 | 0.0004 | 412  | 54 | 432  | 10 | 432  | 8  |
| 86 | 0.87 | 1.2219 | 0.0402 | 0.1305 | 0.0027 | 0.0385 | 0.0007 | 785  | 51 | 811  | 18 | 790  | 15 |
| 87 | 0.92 | 1.1578 | 0.0450 | 0.1278 | 0.0026 | 0.0377 | 0.0008 | 718  | 58 | 781  | 21 | 775  | 15 |
| 88 | 0.70 | 0.2346 | 0.0069 | 0.0333 | 0.0007 | 0.0102 | 0.0002 | 236  | 61 | 214  | 6  | 211  | 4  |
| 89 | 2.15 | 1.0818 | 0.0242 | 0.1213 | 0.0024 | 0.0364 | 0.0006 | 757  | 44 | 745  | 12 | 738  | 14 |
| 90 | 0.89 | 1.3107 | 0.0314 | 0.1417 | 0.0029 | 0.0416 | 0.0008 | 842  | 44 | 850  | 14 | 854  | 16 |
| 91 | 0.55 | 1.3573 | 0.0464 | 0.1491 | 0.0030 | 0.0519 | 0.0010 | 792  | 52 | 871  | 20 | 896  | 17 |
| 92 | 0.33 | 0.2550 | 0.0075 | 0.0350 | 0.0007 | 0.0110 | 0.0002 | 249  | 61 | 231  | 6  | 222  | 4  |
| 93 | 0.95 | 1.7545 | 0.0456 | 0.1648 | 0.0033 | 0.0527 | 0.0010 | 1103 | 43 | 1029 | 17 | 983  | 18 |
| 94 | 0.43 | 0.2883 | 0.0090 | 0.0345 | 0.0007 | 0.0128 | 0.0003 | 650  | 60 | 257  | 7  | 218  | 4  |



|     |      |         |        |        |        |        |        |      |    |      |    |      |    |
|-----|------|---------|--------|--------|--------|--------|--------|------|----|------|----|------|----|
| 95  | 0.94 | 1.2122  | 0.0377 | 0.1323 | 0.0027 | 0.0401 | 0.0008 | 786  | 50 | 806  | 17 | 801  | 15 |
| 96  | 1.08 | 1.1531  | 0.0374 | 0.1239 | 0.0025 | 0.0359 | 0.0007 | 714  | 52 | 779  | 18 | 753  | 14 |
| 97  | 0.95 | 1.2466  | 0.0304 | 0.1343 | 0.0027 | 0.0391 | 0.0007 | 841  | 44 | 822  | 14 | 813  | 15 |
| 98  | 0.80 | 5.8341  | 0.2005 | 0.3542 | 0.0072 | 0.0988 | 0.0018 | 2017 | 38 | 1952 | 30 | 1955 | 34 |
| 99  | 1.18 | 10.7677 | 0.3007 | 0.4727 | 0.0095 | 0.1294 | 0.0023 | 2492 | 34 | 2503 | 26 | 2496 | 42 |
| 100 | 1.14 | 1.1065  | 0.0292 | 0.1233 | 0.0025 | 0.0357 | 0.0007 | 749  | 47 | 757  | 14 | 750  | 14 |
| 101 | 1.10 | 0.9117  | 0.0491 | 0.0684 | 0.0015 | 0.0192 | 0.0005 | 1576 | 68 | 658  | 26 | 427  | 9  |
| 102 | 1.04 | 1.1224  | 0.0485 | 0.1053 | 0.0022 | 0.0369 | 0.0008 | 1084 | 59 | 764  | 23 | 645  | 13 |
| 103 | 0.27 | 1.8365  | 0.0634 | 0.1764 | 0.0036 | 0.0526 | 0.0012 | 1053 | 48 | 1059 | 23 | 1047 | 20 |
| 104 | 1.24 | 1.2250  | 0.0458 | 0.1288 | 0.0027 | 0.0382 | 0.0007 | 842  | 55 | 812  | 21 | 781  | 15 |
| 105 | 0.67 | 0.2605  | 0.0081 | 0.0336 | 0.0007 | 0.0099 | 0.0002 | 413  | 61 | 235  | 7  | 213  | 4  |
| 106 | 0.46 | 9.9090  | 0.2451 | 0.4555 | 0.0092 | 0.1271 | 0.0023 | 2433 | 34 | 2426 | 23 | 2420 | 41 |
| 107 | 0.90 | 0.3374  | 0.0085 | 0.0292 | 0.0006 | 0.0110 | 0.0002 | 1309 | 45 | 295  | 6  | 186  | 4  |
| 108 | 0.52 | 1.2977  | 0.0368 | 0.1355 | 0.0028 | 0.0401 | 0.0008 | 836  | 47 | 845  | 16 | 819  | 16 |
| 109 | 1.03 | 1.1898  | 0.0454 | 0.1283 | 0.0027 | 0.0383 | 0.0008 | 801  | 56 | 796  | 21 | 778  | 15 |
| 110 | 0.86 | 1.0578  | 0.0337 | 0.1210 | 0.0025 | 0.0363 | 0.0007 | 746  | 52 | 733  | 17 | 736  | 14 |
| 111 | 0.81 | 1.4686  | 0.0342 | 0.1337 | 0.0027 | 0.0409 | 0.0007 | 1181 | 41 | 918  | 14 | 809  | 15 |
| 112 | 0.14 | 1.1798  | 0.0287 | 0.1220 | 0.0025 | 0.0384 | 0.0008 | 911  | 44 | 791  | 13 | 742  | 14 |
| 113 | 0.76 | 0.3230  | 0.0139 | 0.0337 | 0.0007 | 0.0122 | 0.0003 | 966  | 74 | 284  | 11 | 214  | 5  |
| 114 | 2.53 | 1.1044  | 0.0386 | 0.1249 | 0.0026 | 0.0378 | 0.0007 | 800  | 54 | 756  | 19 | 759  | 15 |
| 115 | 0.90 | 1.1528  | 0.0386 | 0.1218 | 0.0025 | 0.0363 | 0.0007 | 857  | 52 | 779  | 18 | 741  | 14 |
| 116 | 0.25 | 1.5915  | 0.0398 | 0.1610 | 0.0033 | 0.0496 | 0.0010 | 1018 | 43 | 967  | 16 | 962  | 18 |

|     |      |        |        |        |        |        |        |      |    |      |    |      |    |
|-----|------|--------|--------|--------|--------|--------|--------|------|----|------|----|------|----|
| 117 | 0.19 | 5.8364 | 0.1357 | 0.3517 | 0.0071 | 0.0590 | 0.0011 | 1961 | 36 | 1952 | 20 | 1943 | 34 |
| 118 | 0.72 | 1.8881 | 0.0568 | 0.1797 | 0.0037 | 0.0589 | 0.0011 | 1110 | 45 | 1077 | 20 | 1065 | 20 |
| 119 | 0.90 | 1.0890 | 0.0390 | 0.1163 | 0.0024 | 0.0347 | 0.0007 | 845  | 54 | 748  | 19 | 709  | 14 |
| 120 | 0.35 | 0.2541 | 0.0079 | 0.0359 | 0.0007 | 0.0112 | 0.0002 | 168  | 65 | 230  | 6  | 227  | 5  |

**Z3**

| Analysis spot | Th/U | <sup>207</sup> Pb/ <sup>235</sup> U | 1σ     | <sup>206</sup> Pb/ <sup>238</sup> U | 1σ     | <sup>208</sup> Pb/ <sup>232</sup> Th | 1σ     | <sup>207</sup> Pb/ <sup>206</sup> Pb | 1σ | <sup>207</sup> Pb/ <sup>235</sup> U | 1σ  | <sup>206</sup> Pb/ <sup>238</sup> U | 1σ |
|---------------|------|-------------------------------------|--------|-------------------------------------|--------|--------------------------------------|--------|--------------------------------------|----|-------------------------------------|-----|-------------------------------------|----|
| 1             | 0.25 | 10.3423                             | 1.1202 | 0.4610                              | 0.0111 | 0.1371                               | 0.0053 | 2508                                 | 52 | 2466                                | 100 | 2444                                | 49 |
| 2             | 0.65 | 1.3775                              | 0.0296 | 0.1367                              | 0.0028 | 0.0436                               | 0.0009 | 1165                                 | 40 | 879                                 | 13  | 826                                 | 16 |
| 3             | 1.01 | 0.2102                              | 0.0063 | 0.0296                              | 0.0006 | 0.0098                               | 0.0002 | 353                                  | 32 | 194                                 | 5   | 188                                 | 4  |
| 4             | 0.54 | 8.1970                              | 0.1935 | 0.4143                              | 0.0086 | 0.1128                               | 0.0022 | 2410                                 | 34 | 2253                                | 21  | 2235                                | 39 |
| 5             | 0.90 | 1.0214                              | 0.0249 | 0.1198                              | 0.0025 | 0.0362                               | 0.0007 | 803                                  | 45 | 715                                 | 13  | 729                                 | 14 |
| 6             | 0.49 | 1.0409                              | 0.0287 | 0.1244                              | 0.0026 | 0.0367                               | 0.0007 | 819                                  | 47 | 724                                 | 14  | 756                                 | 15 |
| 7             | 0.36 | 0.3626                              | 0.0093 | 0.0417                              | 0.0009 | 0.0141                               | 0.0003 | 904                                  | 49 | 314                                 | 7   | 264                                 | 5  |
| 8             | 0.60 | 4.2074                              | 0.1309 | 0.2905                              | 0.0061 | 0.0866                               | 0.0017 | 1813                                 | 39 | 1676                                | 26  | 1644                                | 30 |
| 9             | 0.81 | 1.4367                              | 0.0334 | 0.1506                              | 0.0031 | 0.0447                               | 0.0008 | 998                                  | 42 | 904                                 | 14  | 904                                 | 17 |
| 10            | 0.92 | 1.2158                              | 0.0418 | 0.1166                              | 0.0024 | 0.0400                               | 0.0008 | 1013                                 | 51 | 808                                 | 19  | 711                                 | 14 |
| 11            | 0.11 | 1.2208                              | 0.0312 | 0.1337                              | 0.0028 | 0.0432                               | 0.0008 | 847                                  | 45 | 810                                 | 14  | 809                                 | 16 |
| 12            | 0.62 | 1.4733                              | 0.0304 | 0.1548                              | 0.0032 | 0.0623                               | 0.0012 | 990                                  | 41 | 920                                 | 12  | 928                                 | 18 |
| 13            | 0.22 | 4.3293                              | 0.0990 | 0.3015                              | 0.0062 | 0.0840                               | 0.0016 | 1776                                 | 37 | 1699                                | 19  | 1699                                | 31 |
| 14            | 0.40 | 0.4071                              | 0.0099 | 0.0565                              | 0.0012 | 0.0175                               | 0.0003 | 423                                  | 49 | 347                                 | 7   | 354                                 | 7  |
| 15            | 0.76 | 4.1104                              | 0.0978 | 0.2945                              | 0.0061 | 0.0856                               | 0.0016 | 1748                                 | 37 | 1656                                | 19  | 1664                                | 30 |

|    |      |         |        |        |        |        |        |      |    |      |    |      |    |
|----|------|---------|--------|--------|--------|--------|--------|------|----|------|----|------|----|
| 16 | 0.68 | 0.6367  | 0.0194 | 0.0431 | 0.0009 | 0.0226 | 0.0005 | 1775 | 46 | 500  | 12 | 272  | 6  |
| 17 | 0.56 | 0.6367  | 0.0194 | 0.0431 | 0.0009 | 0.0226 | 0.0005 | 1776 | 47 | 501  | 13 | 273  | 7  |
| 18 | 0.56 | 1.2221  | 0.0311 | 0.1328 | 0.0028 | 0.0406 | 0.0008 | 813  | 45 | 811  | 14 | 804  | 16 |
| 19 | 0.84 | 0.6645  | 0.0181 | 0.0839 | 0.0017 | 0.0256 | 0.0005 | 530  | 51 | 517  | 11 | 519  | 10 |
| 20 | 0.12 | 5.2764  | 0.1181 | 0.3347 | 0.0069 | 0.0923 | 0.0017 | 1909 | 36 | 1865 | 19 | 1861 | 33 |
| 21 | 0.38 | 4.6293  | 0.1617 | 0.3108 | 0.0063 | 0.0930 | 0.0019 | 1859 | 39 | 1755 | 29 | 1745 | 31 |
| 22 | 0.73 | 1.3378  | 0.0624 | 0.1285 | 0.0027 | 0.0428 | 0.0009 | 878  | 61 | 862  | 27 | 779  | 15 |
| 23 | 1.04 | 1.1020  | 0.0479 | 0.1175 | 0.0025 | 0.0378 | 0.0008 | 945  | 60 | 754  | 23 | 716  | 14 |
| 24 | 0.99 | 4.2028  | 0.2614 | 0.2531 | 0.0054 | 0.0729 | 0.0015 | 1771 | 50 | 1675 | 51 | 1454 | 28 |
| 25 | 0.53 | 10.0240 | 0.3909 | 0.4584 | 0.0093 | 0.1114 | 0.0023 | 2501 | 35 | 2437 | 36 | 2432 | 41 |
| 26 | 0.40 | 1.1653  | 0.0409 | 0.1312 | 0.0027 | 0.0384 | 0.0007 | 752  | 53 | 784  | 19 | 795  | 15 |
| 27 | 0.66 | 0.4904  | 0.0111 | 0.0387 | 0.0008 | 0.0183 | 0.0003 | 1477 | 41 | 405  | 8  | 245  | 5  |
| 28 | 0.89 | 3.7735  | 0.1028 | 0.2793 | 0.0056 | 0.0817 | 0.0014 | 1593 | 38 | 1587 | 22 | 1588 | 28 |
| 29 | 0.50 | 0.4959  | 0.0131 | 0.0609 | 0.0012 | 0.0188 | 0.0004 | 555  | 51 | 409  | 9  | 381  | 7  |
| 30 | 0.71 | 0.9109  | 0.0205 | 0.1080 | 0.0022 | 0.0376 | 0.0007 | 660  | 44 | 658  | 11 | 661  | 13 |
| 31 | 1.24 | 1.1173  | 0.0296 | 0.1230 | 0.0025 | 0.0364 | 0.0007 | 758  | 46 | 762  | 14 | 748  | 14 |
| 32 | 1.11 | 6.2377  | 0.6313 | 0.3622 | 0.0086 | 0.0886 | 0.0036 | 2178 | 59 | 2010 | 89 | 1993 | 41 |
| 33 | 1.05 | 1.1111  | 0.0289 | 0.1324 | 0.0027 | 0.0398 | 0.0007 | 773  | 46 | 759  | 14 | 802  | 15 |
| 34 | 0.31 | 1.5068  | 0.0371 | 0.1604 | 0.0032 | 0.0475 | 0.0008 | 928  | 43 | 933  | 15 | 959  | 18 |
| 35 | 0.73 | 0.4446  | 0.0089 | 0.0511 | 0.0010 | 0.0136 | 0.0002 | 752  | 42 | 374  | 6  | 321  | 6  |
| 36 | 0.16 | 4.9987  | 0.3193 | 0.3249 | 0.0072 | 0.1136 | 0.0028 | 2556 | 46 | 1819 | 54 | 1814 | 35 |
| 37 | 0.69 | 0.6896  | 0.0144 | 0.0714 | 0.0014 | 0.0377 | 0.0007 | 952  | 41 | 533  | 9  | 445  | 9  |

|    |      |         |        |        |        |        |        |      |     |      |     |      |    |
|----|------|---------|--------|--------|--------|--------|--------|------|-----|------|-----|------|----|
| 38 | 1.13 | 13.2563 | 0.3116 | 0.5174 | 0.0107 | 0.0857 | 0.0017 | 2719 | 33  | 2698 | 22  | 2688 | 45 |
| 39 | 1.15 | 0.2454  | 0.0079 | 0.0332 | 0.0007 | 0.0105 | 0.0002 | 467  | 64  | 223  | 6   | 210  | 4  |
| 40 | 0.77 | 1.2016  | 0.0373 | 0.1229 | 0.0025 | 0.0389 | 0.0007 | 998  | 48  | 801  | 17  | 747  | 14 |
| 41 | 1.27 | 7.4223  | 0.2909 | 0.3950 | 0.0080 | 0.1110 | 0.0021 | 2211 | 37  | 2164 | 35  | 2146 | 37 |
| 42 | 0.74 | 5.1345  | 0.1039 | 0.3207 | 0.0064 | 0.0916 | 0.0016 | 1926 | 35  | 1842 | 17  | 1793 | 31 |
| 43 | 0.72 | 0.4941  | 0.0112 | 0.0582 | 0.0012 | 0.0199 | 0.0004 | 717  | 45  | 408  | 8   | 365  | 7  |
| 44 | 0.21 | 1.1604  | 0.0286 | 0.1289 | 0.0026 | 0.0377 | 0.0007 | 865  | 44  | 782  | 13  | 782  | 15 |
| 45 | 0.15 | 0.5742  | 0.0120 | 0.0697 | 0.0014 | 0.0251 | 0.0005 | 640  | 44  | 461  | 8   | 434  | 8  |
| 46 | 0.77 | 1.1485  | 0.0295 | 0.1281 | 0.0026 | 0.0372 | 0.0007 | 778  | 46  | 777  | 14  | 777  | 15 |
| 47 | 0.92 | 0.5191  | 0.0109 | 0.0637 | 0.0013 | 0.0186 | 0.0003 | 584  | 44  | 425  | 7   | 398  | 8  |
| 48 | 0.21 | 4.5468  | 0.2652 | 0.2999 | 0.0064 | 0.0738 | 0.0017 | 1862 | 47  | 1740 | 49  | 1691 | 31 |
| 49 | 0.93 | 0.9713  | 0.0236 | 0.1098 | 0.0022 | 0.0365 | 0.0007 | 772  | 45  | 689  | 12  | 672  | 13 |
| 50 | 1.02 | 1.9128  | 0.4684 | 0.1844 | 0.0090 | 0.0522 | 0.0071 | 1974 | 196 | 1086 | 163 | 1091 | 49 |
| 51 | 1.30 | 0.8004  | 0.0180 | 0.0992 | 0.0020 | 0.0279 | 0.0011 | 573  | 45  | 597  | 10  | 610  | 12 |
| 52 | 0.51 | 1.2852  | 0.0284 | 0.1327 | 0.0027 | 0.0372 | 0.0007 | 965  | 42  | 839  | 13  | 803  | 15 |
| 53 | 0.86 | 6.0357  | 0.3828 | 0.3500 | 0.0075 | 0.0905 | 0.0026 | 2118 | 46  | 1981 | 55  | 1935 | 36 |
| 54 | 0.42 | 0.3993  | 0.0105 | 0.0413 | 0.0008 | 0.0130 | 0.0002 | 906  | 49  | 341  | 8   | 261  | 5  |
| 55 | 0.86 | 0.6350  | 0.0157 | 0.0761 | 0.0015 | 0.0229 | 0.0004 | 667  | 47  | 499  | 10  | 473  | 9  |
| 56 | 0.14 | 1.9364  | 0.0455 | 0.1670 | 0.0033 | 0.0470 | 0.0009 | 1334 | 40  | 1094 | 16  | 995  | 18 |
| 57 | 0.01 | 0.2939  | 0.0068 | 0.0420 | 0.0008 | 0.0128 | 0.0002 | 263  | 50  | 262  | 5   | 265  | 5  |
| 58 | 0.85 | 5.0701  | 0.8697 | 0.3270 | 0.0100 | 0.0800 | 0.0049 | 2116 | 96  | 1831 | 145 | 1824 | 49 |
| 59 | 0.38 | 0.3528  | 0.0106 | 0.0472 | 0.0010 | 0.0143 | 0.0003 | 361  | 59  | 307  | 8   | 297  | 6  |

|    |      |         |        |        |        |        |        |      |     |      |     |      |    |
|----|------|---------|--------|--------|--------|--------|--------|------|-----|------|-----|------|----|
| 60 | 1.17 | 0.4043  | 0.0117 | 0.0481 | 0.0010 | 0.0158 | 0.0003 | 683  | 54  | 345  | 8   | 303  | 6  |
| 61 | 0.41 | 1.2969  | 0.0290 | 0.1215 | 0.0024 | 0.0332 | 0.0006 | 1128 | 41  | 844  | 13  | 739  | 14 |
| 62 | 0.49 | 0.6383  | 0.0147 | 0.0750 | 0.0015 | 0.0262 | 0.0005 | 839  | 44  | 501  | 9   | 466  | 9  |
| 63 | 0.42 | 1.2961  | 0.0481 | 0.1447 | 0.0030 | 0.0424 | 0.0009 | 765  | 54  | 844  | 21  | 871  | 17 |
| 64 | 0.65 | 0.5574  | 0.0150 | 0.0646 | 0.0013 | 0.0235 | 0.0004 | 801  | 49  | 450  | 10  | 404  | 8  |
| 65 | 0.38 | 0.3732  | 0.0121 | 0.0430 | 0.0009 | 0.0147 | 0.0003 | 755  | 59  | 322  | 9   | 271  | 5  |
| 66 | 1.18 | 1.4112  | 0.0307 | 0.1488 | 0.0030 | 0.0439 | 0.0008 | 905  | 42  | 894  | 13  | 894  | 17 |
| 67 | 0.56 | 1.2121  | 0.0270 | 0.1325 | 0.0026 | 0.0390 | 0.0007 | 832  | 43  | 806  | 12  | 802  | 15 |
| 68 | 0.01 | 3.8896  | 0.1599 | 0.2895 | 0.0059 | 0.0850 | 0.0016 | 1596 | 43  | 1612 | 33  | 1639 | 30 |
| 69 | 0.87 | 0.7746  | 0.0169 | 0.0971 | 0.0019 | 0.0280 | 0.0010 | 567  | 45  | 582  | 10  | 598  | 11 |
| 70 | 0.69 | 10.4947 | 0.2646 | 0.4701 | 0.0094 | 0.1267 | 0.0022 | 2476 | 34  | 2480 | 23  | 2484 | 41 |
| 71 | 0.56 | 1.2840  | 0.0275 | 0.1376 | 0.0027 | 0.0362 | 0.0007 | 867  | 42  | 839  | 12  | 831  | 15 |
| 72 | 0.97 | 5.0997  | 0.1109 | 0.3312 | 0.0066 | 0.0911 | 0.0016 | 1841 | 36  | 1836 | 18  | 1844 | 32 |
| 73 | 0.86 | 3.6898  | 0.0870 | 0.2750 | 0.0055 | 0.0751 | 0.0013 | 1588 | 38  | 1569 | 19  | 1566 | 28 |
| 74 | 0.48 | 0.3618  | 0.0158 | 0.0436 | 0.0010 | 0.0173 | 0.0005 | 579  | 77  | 314  | 12  | 275  | 6  |
| 75 | 0.27 | 0.9064  | 0.0194 | 0.0949 | 0.0019 | 0.0317 | 0.0006 | 907  | 42  | 655  | 10  | 585  | 11 |
| 76 | 0.62 | 0.5204  | 0.0141 | 0.0689 | 0.0014 | 0.0194 | 0.0004 | 476  | 53  | 425  | 9   | 429  | 8  |
| 77 | 0.38 | 5.8366  | 0.1532 | 0.3496 | 0.0070 | 0.0536 | 0.0010 | 2051 | 36  | 1952 | 23  | 1933 | 33 |
| 78 | 1.05 | 8.4933  | 2.6375 | 0.4314 | 0.0194 | 0.1686 | 0.0105 | 2536 | 128 | 2285 | 282 | 2312 | 87 |
| 79 | 0.01 | 2.5909  | 0.0588 | 0.2264 | 0.0045 | 0.0719 | 0.0013 | 1296 | 39  | 1298 | 17  | 1316 | 24 |
| 80 | 0.60 | 0.7924  | 0.0163 | 0.0888 | 0.0018 | 0.0391 | 0.0007 | 863  | 42  | 593  | 9   | 548  | 10 |
| 81 | 0.69 | 0.5810  | 0.0145 | 0.0589 | 0.0012 | 0.0187 | 0.0003 | 963  | 45  | 465  | 9   | 369  | 7  |

|    |      |         |        |        |        |        |        |      |     |      |     |      |    |
|----|------|---------|--------|--------|--------|--------|--------|------|-----|------|-----|------|----|
| 82 | 0.07 | 7.5908  | 0.1705 | 0.3968 | 0.0079 | 0.1013 | 0.0018 | 2212 | 34  | 2184 | 20  | 2154 | 36 |
| 83 | 0.85 | 1.7284  | 0.0508 | 0.1550 | 0.0031 | 0.0487 | 0.0009 | 1141 | 44  | 1019 | 19  | 929  | 17 |
| 84 | 0.35 | 8.8313  | 0.1924 | 0.4295 | 0.0085 | 0.1091 | 0.0019 | 2351 | 34  | 2321 | 20  | 2303 | 38 |
| 85 | 0.76 | 0.3770  | 0.0094 | 0.0404 | 0.0008 | 0.0139 | 0.0003 | 849  | 48  | 325  | 7   | 255  | 5  |
| 86 | 1.44 | 1.9099  | 0.3739 | 0.1835 | 0.0069 | 0.0448 | 0.0034 | 1617 | 165 | 1085 | 130 | 1086 | 38 |
| 87 | 1.26 | 0.3634  | 0.0111 | 0.0340 | 0.0007 | 0.0150 | 0.0003 | 1162 | 53  | 315  | 8   | 216  | 4  |
| 88 | 1.10 | 0.5399  | 0.0133 | 0.0699 | 0.0014 | 0.0204 | 0.0004 | 502  | 50  | 438  | 9   | 435  | 8  |
| 89 | 0.93 | 1.0684  | 0.0492 | 0.1224 | 0.0026 | 0.0370 | 0.0008 | 883  | 63  | 738  | 24  | 744  | 15 |
| 90 | 0.25 | 4.5546  | 0.1079 | 0.3053 | 0.0061 | 0.0830 | 0.0015 | 1750 | 37  | 1741 | 20  | 1717 | 30 |
| 91 | 0.84 | 9.6630  | 0.2067 | 0.4515 | 0.0089 | 0.1169 | 0.0020 | 2406 | 34  | 2403 | 20  | 2402 | 40 |
| 92 | 0.57 | 0.3560  | 0.0139 | 0.0388 | 0.0008 | 0.0154 | 0.0004 | 841  | 68  | 309  | 10  | 246  | 5  |
| 93 | 0.37 | 1.1785  | 0.0256 | 0.1260 | 0.0025 | 0.0372 | 0.0007 | 858  | 42  | 791  | 12  | 765  | 14 |
| 94 | 0.51 | 10.0022 | 0.2359 | 0.4537 | 0.0090 | 0.1096 | 0.0020 | 2490 | 34  | 2435 | 22  | 2412 | 40 |
| 95 | 0.96 | 2.2002  | 0.0600 | 0.2034 | 0.0041 | 0.0601 | 0.0011 | 1145 | 42  | 1181 | 19  | 1194 | 22 |
| 96 | 0.66 | 1.1589  | 0.0289 | 0.1304 | 0.0026 | 0.0346 | 0.0006 | 796  | 45  | 781  | 14  | 790  | 15 |

---

**Z4**

| Analysis spot | Th/U | <sup>207</sup> Pb/ <sup>235</sup> U | 1σ     | <sup>206</sup> Pb/ <sup>238</sup> U | 1σ     | <sup>208</sup> Pb/ <sup>232</sup> Th | 1σ     | <sup>207</sup> Pb/ <sup>206</sup> Pb | 1σ | <sup>207</sup> Pb/ <sup>235</sup> U | 1σ | <sup>206</sup> Pb/ <sup>238</sup> U | 1σ |
|---------------|------|-------------------------------------|--------|-------------------------------------|--------|--------------------------------------|--------|--------------------------------------|----|-------------------------------------|----|-------------------------------------|----|
| 1             | 0.48 | 1.0868                              | 0.0254 | 0.1034                              | 0.0021 | 0.0249                               | 0.0005 | 1051                                 | 42 | 747                                 | 12 | 634                                 | 12 |
| 2             | 0.51 | 1.1849                              | 0.0263 | 0.1272                              | 0.0026 | 0.0377                               | 0.0007 | 799                                  | 43 | 794                                 | 12 | 772                                 | 15 |
| 3             | 0.48 | 1.7167                              | 0.0391 | 0.1706                              | 0.0035 | 0.0493                               | 0.0009 | 980                                  | 42 | 1015                                | 15 | 1015                                | 19 |
| 4             | 0.45 | 1.5716                              | 0.0363 | 0.1587                              | 0.0032 | 0.0448                               | 0.0009 | 939                                  | 42 | 959                                 | 14 | 949                                 | 18 |

|    |      |         |        |        |        |        |        |      |    |      |    |      |    |
|----|------|---------|--------|--------|--------|--------|--------|------|----|------|----|------|----|
| 5  | 0.90 | 1.2296  | 0.0320 | 0.1329 | 0.0027 | 0.0427 | 0.0008 | 850  | 45 | 814  | 15 | 804  | 15 |
| 6  | 0.18 | 1.3041  | 0.0318 | 0.1196 | 0.0024 | 0.0433 | 0.0008 | 1156 | 42 | 848  | 14 | 728  | 14 |
| 7  | 0.91 | 1.9843  | 0.0448 | 0.1839 | 0.0038 | 0.0523 | 0.0010 | 1123 | 41 | 1110 | 15 | 1088 | 20 |
| 8  | 0.86 | 0.3240  | 0.0096 | 0.0443 | 0.0009 | 0.0142 | 0.0003 | 279  | 59 | 285  | 7  | 280  | 6  |
| 9  | 0.43 | 1.9753  | 0.0472 | 0.1817 | 0.0037 | 0.0561 | 0.0011 | 1110 | 41 | 1107 | 16 | 1076 | 20 |
| 10 | 0.44 | 1.3897  | 0.0368 | 0.1455 | 0.0030 | 0.0477 | 0.0009 | 910  | 45 | 885  | 16 | 876  | 17 |
| 11 | 1.11 | 1.3151  | 0.0298 | 0.1360 | 0.0028 | 0.0434 | 0.0008 | 871  | 43 | 852  | 13 | 822  | 16 |
| 12 | 0.04 | 1.6727  | 0.0374 | 0.1660 | 0.0034 | 0.0576 | 0.0011 | 1001 | 41 | 998  | 14 | 990  | 19 |
| 13 | 1.04 | 1.2679  | 0.0428 | 0.1311 | 0.0027 | 0.0397 | 0.0008 | 899  | 51 | 831  | 19 | 794  | 16 |
| 14 | 0.32 | 0.3630  | 0.0101 | 0.0446 | 0.0009 | 0.0159 | 0.0003 | 563  | 54 | 314  | 8  | 281  | 6  |
| 15 | 1.03 | 2.3463  | 0.0529 | 0.2131 | 0.0043 | 0.0638 | 0.0012 | 1120 | 41 | 1226 | 16 | 1245 | 23 |
| 16 | 0.41 | 5.4945  | 0.1580 | 0.3444 | 0.0071 | 0.1018 | 0.0020 | 1816 | 38 | 1900 | 25 | 1908 | 34 |
| 17 | 1.88 | 0.2906  | 0.0143 | 0.0401 | 0.0009 | 0.0138 | 0.0004 | 306  | 93 | 259  | 11 | 253  | 5  |
| 18 | 0.94 | 1.4576  | 0.0335 | 0.1407 | 0.0029 | 0.0414 | 0.0008 | 1067 | 41 | 913  | 14 | 849  | 16 |
| 19 | 0.57 | 7.9097  | 0.4499 | 0.4093 | 0.0088 | 0.0471 | 0.0013 | 2198 | 42 | 2221 | 51 | 2212 | 40 |
| 20 | 0.63 | 1.2781  | 0.0304 | 0.1269 | 0.0026 | 0.0398 | 0.0008 | 944  | 43 | 836  | 14 | 770  | 15 |
| 21 | 0.46 | 0.4405  | 0.0105 | 0.0489 | 0.0010 | 0.0112 | 0.0002 | 731  | 46 | 371  | 7  | 308  | 6  |
| 22 | 0.42 | 11.3867 | 0.2971 | 0.4845 | 0.0099 | 0.1297 | 0.0025 | 2547 | 34 | 2555 | 24 | 2547 | 43 |
| 23 | 1.67 | 1.1099  | 0.0294 | 0.1057 | 0.0022 | 0.0344 | 0.0007 | 1044 | 45 | 758  | 14 | 648  | 13 |
| 24 | 0.92 | 0.3049  | 0.0124 | 0.0302 | 0.0007 | 0.0111 | 0.0003 | 1603 | 65 | 270  | 10 | 192  | 4  |
| 25 | 0.42 | 1.2492  | 0.0277 | 0.1316 | 0.0027 | 0.0415 | 0.0008 | 881  | 42 | 823  | 12 | 797  | 15 |
| 26 | 0.32 | 1.4363  | 0.0317 | 0.1344 | 0.0027 | 0.0365 | 0.0007 | 1065 | 41 | 904  | 13 | 813  | 16 |

|    |      |         |        |        |        |        |        |      |    |      |    |      |    |
|----|------|---------|--------|--------|--------|--------|--------|------|----|------|----|------|----|
| 27 | 0.42 | 6.4255  | 0.1443 | 0.3639 | 0.0074 | 0.1040 | 0.0019 | 2068 | 35 | 2036 | 20 | 2001 | 35 |
| 28 | 0.45 | 11.5205 | 0.2531 | 0.4813 | 0.0098 | 0.1286 | 0.0024 | 2579 | 33 | 2566 | 21 | 2533 | 43 |
| 29 | 0.90 | 1.3614  | 0.0311 | 0.1287 | 0.0026 | 0.0450 | 0.0008 | 1078 | 41 | 873  | 13 | 781  | 15 |
| 30 | 0.57 | 1.1622  | 0.0261 | 0.1230 | 0.0025 | 0.0380 | 0.0007 | 848  | 43 | 783  | 12 | 748  | 14 |
| 31 | 0.60 | 9.9234  | 0.2974 | 0.4552 | 0.0094 | 0.1149 | 0.0022 | 2467 | 35 | 2428 | 28 | 2418 | 42 |
| 32 | 0.84 | 1.2302  | 0.0335 | 0.1324 | 0.0027 | 0.0400 | 0.0008 | 838  | 46 | 814  | 15 | 802  | 16 |
| 33 | 1.03 | 1.3582  | 0.0313 | 0.1313 | 0.0027 | 0.0426 | 0.0008 | 1047 | 42 | 871  | 13 | 796  | 15 |
| 34 | 0.94 | 0.3893  | 0.0121 | 0.0447 | 0.0009 | 0.0143 | 0.0003 | 666  | 57 | 334  | 9  | 282  | 6  |
| 35 | 1.16 | 1.0995  | 0.0267 | 0.1131 | 0.0023 | 0.0355 | 0.0007 | 891  | 44 | 753  | 13 | 691  | 13 |
| 36 | 0.68 | 2.0738  | 0.0493 | 0.1937 | 0.0040 | 0.0570 | 0.0011 | 1077 | 41 | 1140 | 16 | 1141 | 21 |
| 37 | 0.62 | 0.4660  | 0.0106 | 0.0609 | 0.0013 | 0.0189 | 0.0004 | 422  | 47 | 388  | 7  | 381  | 8  |
| 38 | 1.30 | 1.3676  | 0.0339 | 0.1326 | 0.0027 | 0.0327 | 0.0006 | 1059 | 43 | 875  | 15 | 803  | 16 |
| 39 | 1.14 | 2.5284  | 0.1310 | 0.2250 | 0.0049 | 0.0731 | 0.0016 | 1376 | 54 | 1280 | 38 | 1308 | 26 |
| 40 | 0.16 | 1.8218  | 0.0410 | 0.1767 | 0.0036 | 0.0529 | 0.0010 | 1096 | 41 | 1053 | 15 | 1049 | 20 |
| 41 | 0.20 | 10.6568 | 0.2444 | 0.4672 | 0.0096 | 0.1299 | 0.0025 | 2493 | 34 | 2494 | 21 | 2471 | 42 |
| 42 | 0.57 | 1.4134  | 0.0316 | 0.1339 | 0.0027 | 0.0450 | 0.0008 | 1079 | 41 | 895  | 13 | 810  | 16 |
| 43 | 0.88 | 3.8194  | 0.0872 | 0.2777 | 0.0057 | 0.0812 | 0.0015 | 1591 | 38 | 1597 | 18 | 1580 | 29 |
| 44 | 0.67 | 1.1688  | 0.0289 | 0.1137 | 0.0023 | 0.0357 | 0.0007 | 1015 | 43 | 786  | 14 | 694  | 14 |
| 45 | 0.70 | 1.1406  | 0.0329 | 0.1179 | 0.0024 | 0.0400 | 0.0008 | 1048 | 46 | 773  | 16 | 718  | 14 |
| 46 | 0.47 | 0.5489  | 0.0125 | 0.0655 | 0.0014 | 0.0218 | 0.0004 | 627  | 45 | 444  | 8  | 409  | 8  |
| 47 | 0.48 | 0.5531  | 0.0118 | 0.0513 | 0.0011 | 0.0151 | 0.0003 | 1138 | 40 | 447  | 8  | 322  | 6  |
| 48 | 1.00 | 1.1931  | 0.0296 | 0.1257 | 0.0026 | 0.0400 | 0.0008 | 842  | 44 | 797  | 14 | 763  | 15 |



|    |      |         |        |        |        |        |        |      |    |      |    |      |    |
|----|------|---------|--------|--------|--------|--------|--------|------|----|------|----|------|----|
| 49 | 0.61 | 1.2029  | 0.0301 | 0.1190 | 0.0025 | 0.0405 | 0.0008 | 1032 | 43 | 802  | 14 | 725  | 14 |
| 50 | 0.92 | 0.3084  | 0.0128 | 0.0429 | 0.0009 | 0.0142 | 0.0003 | 300  | 79 | 273  | 10 | 271  | 6  |
| 51 | 0.65 | 0.2565  | 0.0059 | 0.0334 | 0.0007 | 0.0110 | 0.0002 | 413  | 48 | 232  | 5  | 212  | 4  |
| 52 | 0.36 | 1.5835  | 0.0380 | 0.1499 | 0.0031 | 0.0486 | 0.0009 | 1076 | 42 | 964  | 15 | 900  | 17 |
| 53 | 0.69 | 5.0186  | 0.1256 | 0.3252 | 0.0067 | 0.0923 | 0.0017 | 1775 | 37 | 1823 | 21 | 1815 | 33 |
| 54 | 0.62 | 0.6104  | 0.0154 | 0.0727 | 0.0015 | 0.0251 | 0.0005 | 639  | 48 | 484  | 10 | 452  | 9  |
| 55 | 0.58 | 0.6367  | 0.0194 | 0.0431 | 0.0009 | 0.0226 | 0.0005 | 1775 | 46 | 500  | 12 | 272  | 6  |
| 56 | 0.42 | 0.5051  | 0.0110 | 0.0564 | 0.0012 | 0.0205 | 0.0004 | 763  | 43 | 415  | 7  | 354  | 7  |
| 57 | 0.97 | 1.2728  | 0.0338 | 0.1328 | 0.0027 | 0.0393 | 0.0008 | 865  | 45 | 834  | 15 | 804  | 16 |
| 58 | 0.82 | 10.5311 | 0.2373 | 0.4631 | 0.0095 | 0.1303 | 0.0024 | 2505 | 34 | 2483 | 21 | 2453 | 42 |
| 59 | 1.32 | 0.5405  | 0.0130 | 0.0606 | 0.0013 | 0.0202 | 0.0004 | 749  | 46 | 439  | 9  | 379  | 8  |
| 60 | 0.68 | 1.5992  | 0.0370 | 0.1507 | 0.0031 | 0.0463 | 0.0009 | 1089 | 41 | 970  | 14 | 905  | 17 |
| 61 | 0.75 | 1.6694  | 0.0416 | 0.1543 | 0.0032 | 0.0423 | 0.0008 | 1162 | 42 | 997  | 16 | 925  | 18 |
| 62 | 0.51 | 0.5849  | 0.0126 | 0.0683 | 0.0014 | 0.0224 | 0.0004 | 654  | 44 | 468  | 8  | 426  | 8  |
| 63 | 0.15 | 0.6009  | 0.0133 | 0.0755 | 0.0016 | 0.0239 | 0.0005 | 479  | 46 | 478  | 8  | 469  | 9  |
| 64 | 0.86 | 1.3408  | 0.0323 | 0.1406 | 0.0029 | 0.0443 | 0.0008 | 906  | 43 | 864  | 14 | 848  | 16 |
| 65 | 0.93 | 1.1427  | 0.0304 | 0.1246 | 0.0026 | 0.0385 | 0.0007 | 845  | 46 | 774  | 14 | 757  | 15 |
| 66 | 0.23 | 0.3618  | 0.0158 | 0.0436 | 0.0010 | 0.0173 | 0.0005 | 579  | 77 | 314  | 12 | 275  | 6  |
| 67 | 0.97 | 1.2208  | 0.0312 | 0.1337 | 0.0028 | 0.0432 | 0.0008 | 847  | 45 | 810  | 14 | 809  | 16 |
| 68 | 0.64 | 1.2318  | 0.0333 | 0.1296 | 0.0027 | 0.0431 | 0.0008 | 853  | 46 | 815  | 15 | 785  | 15 |
| 69 | 0.21 | 13.2563 | 0.3116 | 0.5174 | 0.0107 | 0.0857 | 0.0017 | 2719 | 33 | 2698 | 22 | 2688 | 45 |
| 70 | 1.01 | 10.9151 | 0.2355 | 0.4724 | 0.0097 | 0.1176 | 0.0022 | 2522 | 34 | 2516 | 20 | 2494 | 43 |

|    |      |         |        |        |        |        |        |      |     |      |    |      |    |
|----|------|---------|--------|--------|--------|--------|--------|------|-----|------|----|------|----|
| 71 | 0.34 | 0.3282  | 0.0091 | 0.0381 | 0.0008 | 0.0146 | 0.0003 | 672  | 53  | 288  | 7  | 241  | 5  |
| 72 | 0.75 | 1.2521  | 0.0309 | 0.1243 | 0.0026 | 0.0393 | 0.0008 | 1018 | 43  | 824  | 14 | 755  | 15 |
| 73 | 0.58 | 1.3772  | 0.0309 | 0.1344 | 0.0028 | 0.0474 | 0.0009 | 1062 | 41  | 879  | 13 | 813  | 16 |
| 74 | 0.51 | 1.3155  | 0.1737 | 0.1408 | 0.0046 | 0.0731 | 0.0049 | 1696 | 133 | 853  | 76 | 849  | 26 |
| 75 | 0.45 | 4.5844  | 0.1570 | 0.3073 | 0.0064 | 0.0817 | 0.0016 | 1707 | 40  | 1746 | 29 | 1727 | 32 |
| 76 | 1.41 | 0.7824  | 0.0179 | 0.0878 | 0.0018 | 0.0251 | 0.0005 | 752  | 44  | 587  | 10 | 543  | 11 |
| 77 | 0.68 | 0.7352  | 0.0163 | 0.0821 | 0.0017 | 0.0256 | 0.0005 | 792  | 43  | 560  | 10 | 509  | 10 |
| 78 | 0.32 | 1.7627  | 0.0394 | 0.1676 | 0.0035 | 0.0525 | 0.0010 | 1060 | 41  | 1032 | 14 | 999  | 19 |
| 79 | 0.51 | 1.7034  | 0.0390 | 0.1614 | 0.0033 | 0.0495 | 0.0009 | 1105 | 41  | 1010 | 15 | 965  | 18 |
| 80 | 0.70 | 0.5408  | 0.0122 | 0.0662 | 0.0014 | 0.0216 | 0.0004 | 625  | 45  | 439  | 8  | 413  | 8  |
| 81 | 0.37 | 6.5400  | 0.1515 | 0.3493 | 0.0072 | 0.0671 | 0.0013 | 2178 | 35  | 2051 | 20 | 1931 | 34 |
| 82 | 0.69 | 1.3428  | 0.0327 | 0.1404 | 0.0029 | 0.0446 | 0.0009 | 909  | 43  | 865  | 14 | 847  | 16 |
| 83 | 0.41 | 7.2293  | 0.1620 | 0.3901 | 0.0081 | 0.1104 | 0.0021 | 2147 | 35  | 2140 | 20 | 2124 | 37 |
| 84 | 0.46 | 0.5256  | 0.0120 | 0.0496 | 0.0010 | 0.0252 | 0.0005 | 1169 | 42  | 429  | 8  | 312  | 6  |
| 85 | 0.86 | 1.1415  | 0.0295 | 0.1223 | 0.0025 | 0.0374 | 0.0007 | 829  | 45  | 773  | 14 | 744  | 15 |
| 86 | 0.53 | 1.2110  | 0.0263 | 0.1246 | 0.0026 | 0.0370 | 0.0007 | 939  | 41  | 806  | 12 | 757  | 15 |
| 87 | 0.54 | 1.1971  | 0.0279 | 0.1172 | 0.0024 | 0.0370 | 0.0007 | 1031 | 42  | 799  | 13 | 714  | 14 |
| 88 | 0.97 | 3.3829  | 0.2081 | 0.2533 | 0.0056 | 0.0716 | 0.0017 | 1573 | 55  | 1500 | 48 | 1455 | 29 |
| 89 | 0.30 | 5.1252  | 0.1164 | 0.3251 | 0.0067 | 0.0935 | 0.0018 | 1853 | 36  | 1840 | 19 | 1815 | 33 |
| 90 | 0.20 | 20.1534 | 0.4321 | 0.5286 | 0.0109 | 0.1446 | 0.0027 | 3333 | 31  | 3099 | 21 | 2736 | 46 |
| 91 | 0.43 | 1.7680  | 0.0432 | 0.1587 | 0.0033 | 0.0512 | 0.0010 | 1178 | 41  | 1034 | 16 | 949  | 18 |
| 92 | 0.91 | 1.3671  | 0.0372 | 0.1284 | 0.0027 | 0.0378 | 0.0007 | 1100 | 44  | 875  | 16 | 779  | 15 |

|     |      |        |        |        |        |        |        |      |    |      |    |      |    |
|-----|------|--------|--------|--------|--------|--------|--------|------|----|------|----|------|----|
| 93  | 1.04 | 1.2435 | 0.0346 | 0.1321 | 0.0028 | 0.0394 | 0.0008 | 855  | 46 | 821  | 16 | 800  | 16 |
| 94  | 0.64 | 1.0650 | 0.0350 | 0.1278 | 0.0027 | 0.0445 | 0.0009 | 971  | 51 | 736  | 17 | 775  | 15 |
| 95  | 0.98 | 0.4592 | 0.0118 | 0.0450 | 0.0009 | 0.0147 | 0.0003 | 1047 | 46 | 384  | 8  | 284  | 6  |
| 96  | 0.56 | 1.6572 | 0.0360 | 0.1607 | 0.0033 | 0.0474 | 0.0009 | 1045 | 41 | 992  | 14 | 961  | 18 |
| 97  | 0.66 | 0.3469 | 0.0086 | 0.0465 | 0.0010 | 0.0143 | 0.0003 | 319  | 51 | 302  | 6  | 293  | 6  |
| 98  | 0.96 | 0.9326 | 0.0207 | 0.0983 | 0.0020 | 0.0306 | 0.0006 | 892  | 42 | 669  | 11 | 605  | 12 |
| 99  | 1.06 | 1.1193 | 0.0352 | 0.1199 | 0.0025 | 0.0389 | 0.0008 | 860  | 50 | 763  | 17 | 730  | 15 |
| 100 | 0.23 | 1.6336 | 0.0430 | 0.1500 | 0.0031 | 0.0388 | 0.0008 | 1178 | 42 | 983  | 17 | 901  | 18 |
| 101 | 0.29 | 5.2612 | 0.1267 | 0.3218 | 0.0067 | 0.0873 | 0.0017 | 1932 | 36 | 1863 | 21 | 1799 | 33 |
| 102 | 0.60 | 1.8631 | 0.0703 | 0.1776 | 0.0038 | 0.0546 | 0.0013 | 2161 | 44 | 1068 | 25 | 1054 | 21 |
| 103 | 0.44 | 6.1372 | 0.1404 | 0.3609 | 0.0075 | 0.0681 | 0.0013 | 2011 | 36 | 1996 | 20 | 1986 | 35 |
| 104 | 0.50 | 0.5546 | 0.0141 | 0.0595 | 0.0012 | 0.0183 | 0.0004 | 898  | 46 | 448  | 9  | 372  | 8  |
| 105 | 1.16 | 1.2421 | 0.0320 | 0.1325 | 0.0028 | 0.0411 | 0.0008 | 863  | 45 | 820  | 14 | 802  | 16 |
| 106 | 0.53 | 1.8030 | 0.0454 | 0.1781 | 0.0037 | 0.0543 | 0.0010 | 1009 | 43 | 1047 | 16 | 1056 | 20 |
| 107 | 0.18 | 5.1940 | 0.1265 | 0.3284 | 0.0068 | 0.0886 | 0.0017 | 1874 | 37 | 1852 | 21 | 1831 | 33 |
| 108 | 0.10 | 7.6392 | 0.2018 | 0.4043 | 0.0084 | 0.0978 | 0.0020 | 2189 | 35 | 2190 | 24 | 2189 | 39 |
| 109 | 0.82 | 1.2474 | 0.0287 | 0.1333 | 0.0028 | 0.0347 | 0.0007 | 963  | 42 | 822  | 13 | 807  | 16 |
| 110 | 1.20 | 0.6471 | 0.0151 | 0.0792 | 0.0016 | 0.0243 | 0.0005 | 606  | 46 | 507  | 9  | 491  | 10 |
| 111 | 0.99 | 1.0207 | 0.0345 | 0.1176 | 0.0025 | 0.0378 | 0.0008 | 735  | 54 | 714  | 17 | 717  | 14 |
| 112 | 0.56 | 1.0006 | 0.0247 | 0.0958 | 0.0020 | 0.0362 | 0.0007 | 1082 | 43 | 704  | 13 | 590  | 12 |
| 113 | 1.05 | 1.0124 | 0.0224 | 0.1158 | 0.0024 | 0.0344 | 0.0006 | 732  | 43 | 710  | 11 | 706  | 14 |
| 114 | 1.11 | 0.8734 | 0.0202 | 0.1032 | 0.0021 | 0.0344 | 0.0007 | 680  | 45 | 637  | 11 | 633  | 13 |

---

|     |      |        |        |        |        |        |        |      |    |      |    |      |    |
|-----|------|--------|--------|--------|--------|--------|--------|------|----|------|----|------|----|
| 115 | 0.40 | 0.4612 | 0.0118 | 0.0608 | 0.0013 | 0.0189 | 0.0004 | 381  | 51 | 385  | 8  | 380  | 8  |
| 116 | 0.86 | 1.1219 | 0.0322 | 0.1237 | 0.0026 | 0.0401 | 0.0008 | 790  | 48 | 764  | 15 | 752  | 15 |
| 117 | 0.36 | 9.9896 | 0.3320 | 0.4508 | 0.0095 | 0.1186 | 0.0023 | 2486 | 35 | 2434 | 31 | 2399 | 42 |
| 118 | 0.45 | 4.9938 | 0.1296 | 0.3156 | 0.0066 | 0.1000 | 0.0019 | 1811 | 37 | 1818 | 22 | 1768 | 32 |
| 119 | 0.51 | 1.4604 | 0.0326 | 0.1429 | 0.0030 | 0.0469 | 0.0009 | 1024 | 41 | 914  | 13 | 861  | 17 |
| 120 | 0.96 | 1.0762 | 0.0329 | 0.1124 | 0.0024 | 0.0377 | 0.0007 | 918  | 49 | 742  | 16 | 687  | 14 |
| 121 | 1.52 | 1.1510 | 0.0334 | 0.1160 | 0.0024 | 0.0378 | 0.0007 | 912  | 47 | 778  | 16 | 707  | 14 |

---

**Table S4.** Quantitative comparison of age distributions for the Anhua basin (Z1&Z2; Z3&Z4).

|                                                                                                                                                                              |                               |                        |                    |             |                       |                    |          |                       |                    |
|------------------------------------------------------------------------------------------------------------------------------------------------------------------------------|-------------------------------|------------------------|--------------------|-------------|-----------------------|--------------------|----------|-----------------------|--------------------|
| Z1+Z2                                                                                                                                                                        | cross correlation coefficient | mean cross correlation | $0.702 \pm 0.004$  | Kupier test | mean V value          | $0.193 \pm 0.002$  | K-S test | mean D value          | $0.15 \pm 0.003$   |
|                                                                                                                                                                              | sample                        | relative contribution  | standard deviation | sample      | relative contribution | standard deviation | sample   | relative contribution | standard deviation |
|                                                                                                                                                                              | WQL                           | 0.1959                 | 0.041              | WQL         | 0.3470                | 0.024              | WQL      | 0.6781                | 0.031              |
|                                                                                                                                                                              | SP                            | 0.0176                 | 0.012              | SP          | 0.0337                | 0.019              | SP       | 0.0268                | 0.018              |
|                                                                                                                                                                              | BK                            | 0.7865                 | 0.041              | BK          | 0.6193                | 0.028              | BK       | 0.2951                | 0.038              |
|                                                                                                                                                                              |                               |                        |                    |             |                       |                    |          |                       |                    |
| Z3+Z4                                                                                                                                                                        | cross correlation coefficient | mean cross correlation | $0.6 \pm 0.003$    | Kupier test | mean V value          | $0.183 \pm 0.001$  | K-S test | mean D value          | $0.098 \pm 0.002$  |
|                                                                                                                                                                              | sample                        | relative contribution  | standard deviation | sample      | relative contribution | standard deviation | sample   | relative contribution | standard deviation |
|                                                                                                                                                                              | WQL                           | 0.0176                 | 0.011              | WQL         | 0.3904                | 0.043              | WQL      | 0.4534                | 0.022              |
|                                                                                                                                                                              | SP                            | 0.3253                 | 0.040              | SP          | 0.0850                | 0.052              | SP       | 0.0817                | 0.048              |
|                                                                                                                                                                              | BK                            | 0.6570                 | 0.040              | BK          | 0.5246                | 0.016              | BK       | 0.4648                | 0.030              |
| Monte Carlo simulation: 10,000; Percent best fits: 1%<br><b>WQL-</b> West Qinling belt; <b>SG-</b> Songpan-Ganzi terrane; <b>BK-</b> Bikou terrane & northern Sichuan basin. |                               |                        |                    |             |                       |                    |          |                       |                    |

a) DZmix main screen following Monte Carlo calculation of relative contributions for “Z1+Z2”.

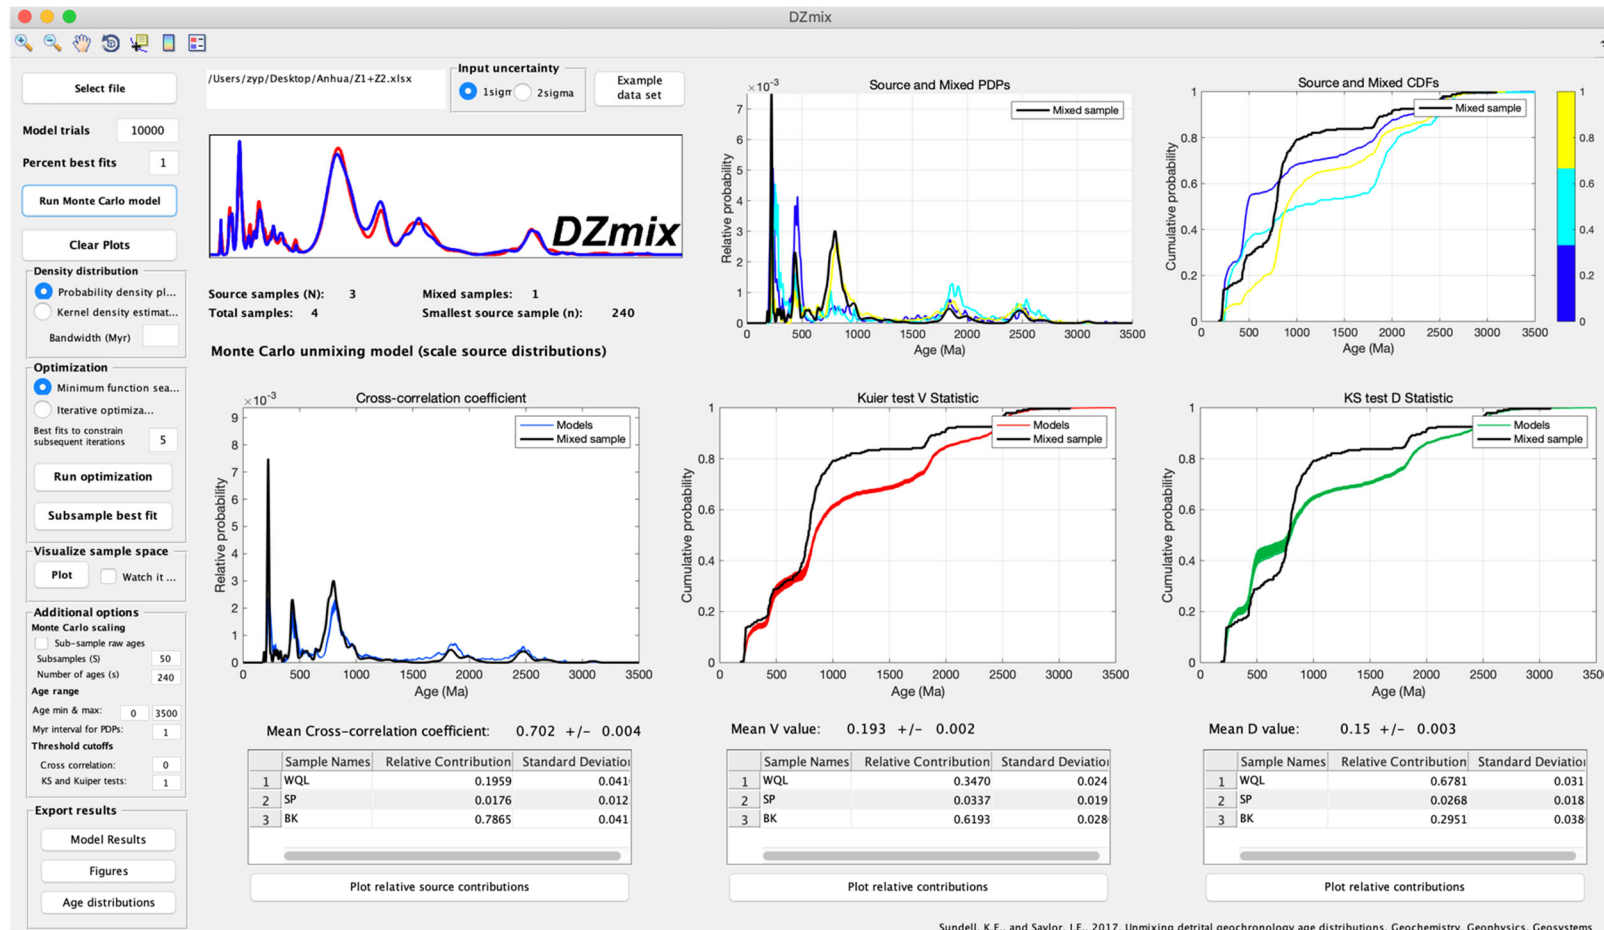

b) DZmix main screen following Monte Carlo calculation of relative contributions for “Z3+Z4”.

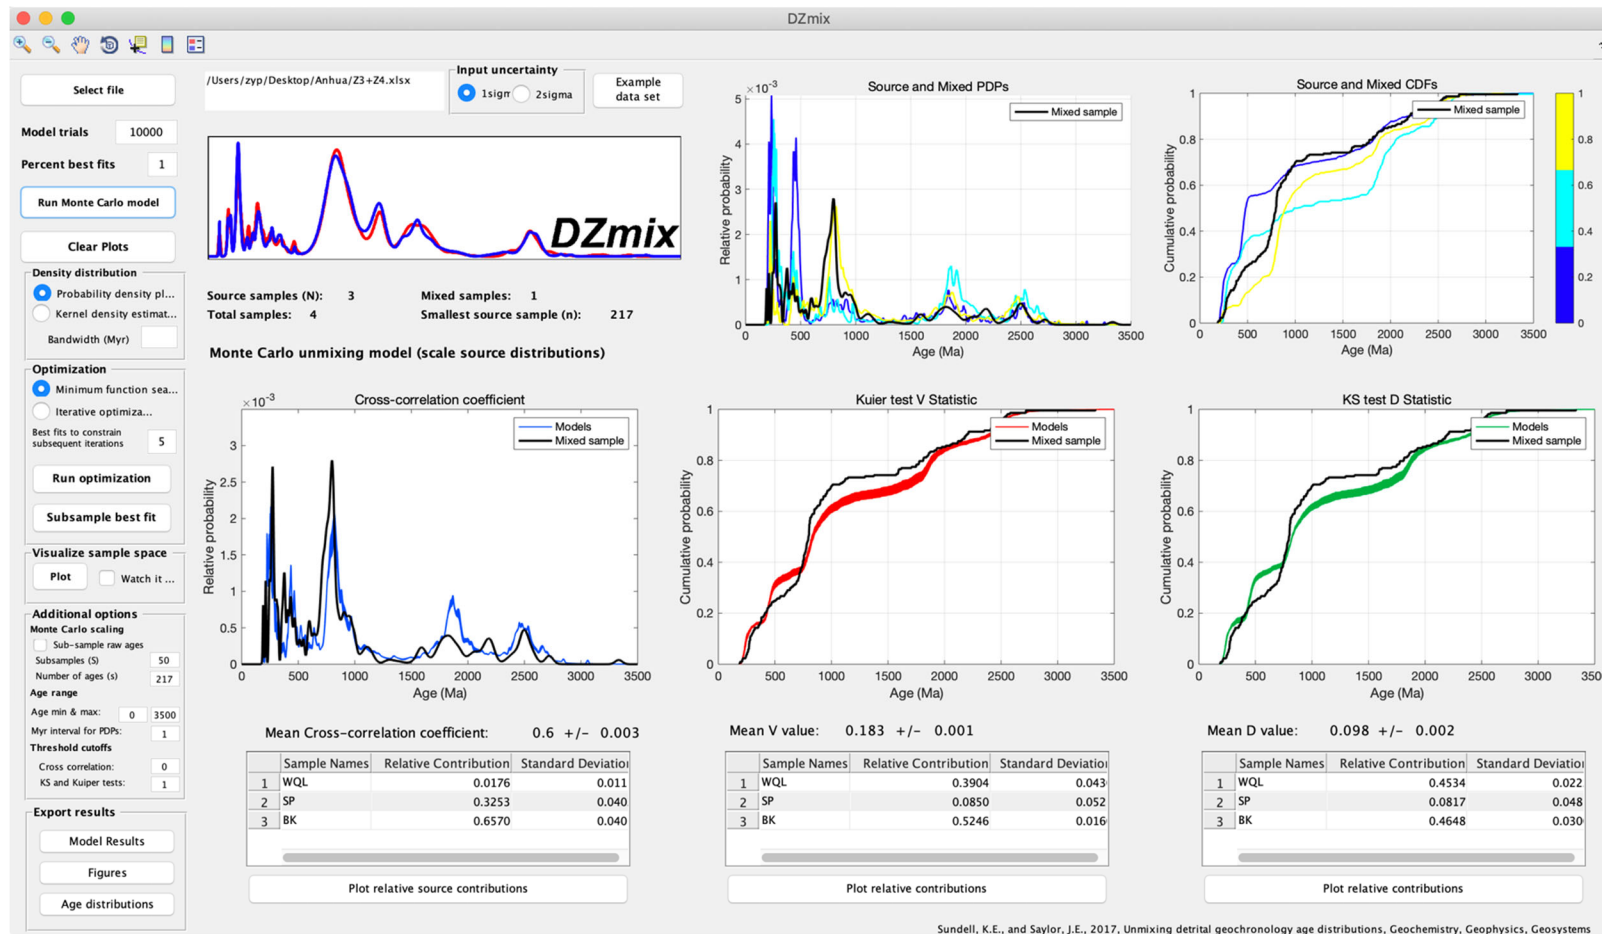

Any use of trade, firm, or product names is for descriptive purposes only and does not imply endorsement by the U.S. Government.

Andersen, T. (2002). Correction of common lead in U–Pb analyses that do not report 204 Pb. *Chemical Geology*, 192(1–2), 59-79. <https://doi.org/10.1016/S0009->

[2541\(02\)00195-X](#)

- Cañón-Tapia, E. (1994). Anisotropy of magnetic susceptibility parameters: Guidelines for their rational selection. *Pure and Applied Geophysics*, 142(2), 365–382. <https://doi.org/10.1007/BF00879310>
- DeCelles, P. G., Gray, M. B., Ridgway, K. D., Cole, R. B., Pivnik, D. A., Pequera, N., & Srivastava, P. (1991). Controls on synorogenic alluvial-fan architecture, Beartooth Conglomerate (Palaeocene), Wyoming and Montana. *Sedimentology*, 38(4), 567-590. <http://dx.doi.org/10.1111/j.1365-3091.1991.tb01009.x>
- Ellwood, B. B. (1978). Flow and emplacement direction determined for selected basaltic bodies using magnetic susceptibility anisotropy measurements. *Earth and Planetary Science Letters*, 41(3), 254-264. <http://www.sciencedirect.com/science/article/pii/0012821X78901826>
- Fang, X. M., Garzzone, C., Van der Voo, R., Li, J. J., & Fan, M. J. (2003). Flexural subsidence by 29 Ma on the NE edge of Tibet from the magnetostratigraphy of Linxia Basin, China. *Earth and Planetary Science Letters*, 210(3–4), 545-560. <http://www.sciencedirect.com/science/article/pii/S0012821X03001420>
- Fisher, R. (1953). Dispersion on a Sphere. *Royal Society of London*, 217(1130), 295-305.
- Fossen, H. (2010). *Structural Geology*. New York: Cambridge University Press.
- GBGMR, G. B. o. G. a. M. R. (1971). Geologic Map of the Lintan Region, with Regional Geologic Report (1:20,000 Scale).
- Gehrels, G., Valencia, V., & Pullen, A. (2006). Detrital zircon geochronology by laser-ablation multicollector ICPMS at the Arizona LaserChron Center. *The Paleontological Society Papers*, 12, 67-76. <https://doi.org/10.1017/S1089332600001352>
- Jones, C. H. (2002). User-driven integrated software lives: “Paleomag” paleomagnetism analysis on the Macintosh. *Computers & geosciences*, 28(10), 1145–1151. [https://doi.org/10.1016/S0098-3004\(02\)00032-8](https://doi.org/10.1016/S0098-3004(02)00032-8)
- Kent, D. V., & Lowrie, W. (1975). On the magnetic susceptibility anisotropy of deep-sea sediment. *Earth and Planetary Science Letters*, 28(1), 1-12. <http://www.sciencedirect.com/science/article/pii/0012821X75900679>
- Li, C., Qiu, Z., & Downs, W. (1980). Early Miocene mammalian fossils of the Xining Basin, Qinghai Province. *Vertebrata Palasiatica*, 18(3), 198-209.
- Liu, Y., Hu, Z., Gao, S., Günther, D., Xu, J., Gao, C., & Chen, H. (2008). In situ analysis of major and trace elements of anhydrous minerals by LA-ICP-MS without applying an internal standard. *Chemical Geology*, 257(1-2), 34-43. <https://doi.org/10.1016/j.chemgeo.2008.08.004>
- Mcfadden, P. L., & McElhinny, M. W. (1990). Classification of the reversal test in palaeomagnetism. *Geophysical Journal International*, 103(3), 725-729.
- Miall, A. D. (1978). *Principles of sedimentary basin analysis*. New York: Springer Science.
- QBGMR, Q. B. o. G. a. M. R. (1971). Geologic Map of the Zeku Region, with Regional Geologic Report (1:20,000 Scale).
- Qiu, Z., Xie, J., & Yan, D. (1990). Discovery of some Early Miocene mammalian fossils from Dongxiang, Gansu. *Palasiatica*, 28, P-24.



- Wang, S. Q., Liu, S. P., Xie, G. P., Liu, J., Peng, T. J., Hou, S. K., & Palasiatica, V. (2013). Gomphotherium wimani from Wushan County, China, and its implications for the Miocene stratigraphy of the Tianshui area. *Vertebrata Palasiatica*, 51(1), 71-84.
- Wang, Z., Zhang, P., Garziona, C. N., Lease, R. O., Zhang, G., Zheng, D., et al. (2012). Magnetostratigraphy and depositional history of the Miocene Wushan basin on the NE Tibetan plateau, China: Implications for middle Miocene tectonics of the West Qinling fault zone. *Journal of Asian Earth Sciences*, 44(1), 189–202. <https://doi.org/10.1016/j.jseacs.2011.06.009>
- Zhang, Y., & Xue, X. (1994). *Taphonomy of Longjiagou Hipparionine Fauna (Turolian, Miocene) Wudu County, Gansu Province, China*. Beijing: Geological Publishing House.
